1           **Title: Structure of *Mycobacterium tuberculosis* Cya, an evolutionary ancestor**  
2           **of the mammalian membrane adenylyl cyclases**

3           **Authors:** Ved Mehta<sup>1</sup>, Basavraj Khanppnavar<sup>1,2</sup>, Dina Schuster<sup>1,2,4</sup>, Ilayda Kantarci<sup>1</sup>, Irene  
4           Vercellino<sup>1</sup>, Angela Kosturanova<sup>1</sup>, Tarun Iype<sup>1</sup>, Sasa Stefanic<sup>3</sup>, Paola Picotti<sup>4</sup> and  
5           Volodymyr M. Korkhov<sup>1,2\*</sup>

6           **Affiliations:**

7           <sup>1</sup> Laboratory of Biomolecular Research, Division of Biology and Chemistry, Paul Scherrer  
8           Institute, Villigen, Switzerland

9           <sup>2</sup> Institute of Molecular Biology and Biophysics, ETH Zurich, Switzerland

10          <sup>3</sup> Institute of Parasitology, University of Zurich, Switzerland

11          <sup>4</sup> Institute of Molecular Systems Biology, ETH Zurich, Switzerland

12  
13          \*Corresponding author. E-mail: volodymyr.korkhov@psi.ch  
14

15  
16          **Abstract:** *Mycobacterium tuberculosis* adenylyl cyclase (AC) Rv1625c / Cya is an evolutionary  
17          ancestor of the mammalian membrane ACs and a model system for studies of their structure and  
18          function. Although the vital role of ACs in cellular signaling is well established, the function of  
19          their transmembrane (TM) regions remains unknown. Here we describe the cryo-EM structure of  
20          Cya bound to a stabilizing nanobody at 3.6 Å resolution. The TM helices 1-5 form a structurally  
21          conserved domain that facilitates the assembly of the helical and catalytic domains. The TM region  
22          contains discrete pockets accessible from the extracellular and cytosolic side of the membrane.  
23          Neutralization of the negatively charged extracellular pocket Ex1 destabilizes the cytosolic helical  
24          domain and reduces the catalytic activity of the enzyme. The TM domain acts as a functional  
25          component of Cya, guiding the assembly of the catalytic domain and providing the means for direct  
26          regulation of catalytic activity in response to extracellular ligands.  
27  
28  
29  
30

31          **One-Sentence Summary:** Structure of *M. tuberculosis* membrane adenylyl cyclase Cya  
32

33 Adenylyl cyclases (ACs) convert molecules of ATP into 3,5-cyclic AMP (cAMP), a universal  
34 second messenger and a master regulator of cellular homeostasis (1). In mammalian cells, the  
35 membrane-associated ACs (Fig. 1A) generate cAMP upon activation of the cell surface receptors,  
36 GPCR, via G protein subunits (2), or in some cases by Ca<sup>2+</sup>/calmodulin (3). The cAMP molecules  
37 produced by the ACs bind to a number of effector proteins, including protein kinase A (4), cyclic  
38 nucleotide-gated channel channels (5), EPAC (6), popeye proteins (7) among others, which in turn  
39 regulate virtually all aspects of cellular physiology (8). The nine mammalian membrane ACs  
40 (AC1-9) share the topology and domain organization: twelve transmembrane (TM) helices with  
41 TM6 and TM12 extending to form a coiled coil of the helical domain (HD), linking the TM bundle  
42 to the bipartite catalytic domain (Fig. 1A) (9). Recently we determined the cryo-EM structure of  
43 the full-length AC, the bovine AC9 bound to G protein as subunit, revealing the organization of  
44 the membrane-integral region of a membrane AC (9). Although the structure provided important  
45 insights into the mechanism of AC9 auto-regulation, the role of the elaborate twelve-helical  
46 membrane domain remains unexplained.

47 A putative evolutionary ancestor of the mammalian membrane ACs has been identified in the  
48 genome of *Mycobacterium tuberculosis*: Rv1625c, or Cya (10); for simplicity, we refer to this  
49 protein as Cya throughout. This protein is one of the sixteen ACs present in genome of *M.*  
50 *tuberculosis*, and one of five ACs predicted to be polytopic membrane proteins (11). The exact  
51 function of Cya is not clear, although available evidence indicates that the protein may be involved  
52 in CO<sub>2</sub> sensing (12) and cholesterol utilization by *M. tuberculosis* (13, 14). Cholesterol utilization  
53 during infection by *M. tuberculosis* is linked to its pathogenesis (15), indicating a potential role of  
54 Cya at some stages of macrophage infection. The catalytic domain of Cya belongs to the same fold  
55 as those of the mammalian ACs, the class III AC / guanylyl cyclase (GC). Unlike the mammalian  
56 ACs, Cya is predicted to include only six TM helices, with TM6 extending into a HD connected  
57 to the catalytic domain (Fig. 1B-C). The protein has to dimerize to form a functional unit that has  
58 been previously presumed to resemble the pseudo-heterodimeric fold of the full-length mammalian  
59 ACs (16, 17). Although the structures of the *M. tuberculosis* Cya soluble domain in monomeric  
60 form (16) and that of the homologous *M. intracellulare* Cya in dimeric form (17) have been solved  
61 using X-ray crystallography, a structure of a full-length mycobacterial AC that includes the TM  
62 region has not been determined until now.

63 The role of the membrane domain in membrane ACs is a mystery. Polytopic membrane nucleotidyl  
64 cyclases with membrane domains of known function have been described in several organisms.  
65 The ACs in *Paramecium*, *Plasmodium* and *Tetrahymena* are fused to an ion channel module (18),  
66 and the light-sensitive GCs in several fungi, such as *Blastocladiella emersonii*, which are fused to  
67 a rhodopsin-like membrane module that binds a light-sensitive retinal chromophore (19).  
68 However, the functional role of the TM regions in the mammalian membrane ACs remains unclear.  
69 A recent structure of the bovine AC9 shed relatively little light on the possible function of the  
70 membrane domain (9), but provided a description of the unique TM helix arrangement in the  
71 membrane anchor of the protein. Interestingly, experiments with domain-substituted Cya, a  
72 presumptive evolutionary ancestor of the mammalian ACs, have suggested that its membrane  
73 region may have a regulatory role, potentially acting as a receptor for yet unidentified ligands (20).

74 Understanding the structure and function of the AC membrane domains, conserved through  
75 evolution from bacteria to mammals, is essential for understanding the regulation of cAMP  
76 generation by the cells at rest and during AC activation. The importance and necessity of a complex  
77 polytopic membrane domain in the membrane ACs is one of the key open questions in the cAMP

78 signaling field. To address this key question, we set out to determine the structure of the model  
79 membrane AC, *M. tuberculosis* Cya.

## 80 Results

81 **Characterization of the full-length Cya.** The full-length *M. tuberculosis* Cya (Fig. 1C) was  
82 expressed in *Escherichia coli* and purified in digitonin micelles using affinity chromatography  
83 followed by size exclusion chromatography (Fig. S1). Adenylyl cyclase activity assays confirmed  
84 that the full-length protein was purified in a functional form (Fig. 1D;  $K_m$  for Cya was  $\sim 80 \mu\text{M}$ ).  
85 The “SOL” construct, consisting of the catalytic cytosolic domain (residues 203-428) showed low  
86 activity (Fig. 1D), indicating the importance of the membrane-spanning region for proper assembly  
87 and activity of the cyclase, in agreement with the previous reports (17, 21).

88 **Nanobody NB4 facilitates Cya structure determination.** Cya is a relatively small membrane  
89 protein (45 kDa for a monomer). The presence of a helical domain linking the TM domain with  
90 the catalytic domain of Cya makes this protein a challenging target for structural studies. To  
91 increase the likelihood of high resolution structure determination, we used the purified Cya to  
92 generate a panel of nanobodies, camelid antibody fragments (22), recognizing the target protein  
93 with high affinity. One of these reagents, nanobody 4 (NB4), had no effect on the catalytic activity  
94 of the full-length cyclase (Fig. 1D), but had a nanomolar affinity for the SOL domain (Fig. S1E).  
95 We reconstituted a complex of the detergent-purified full-length Cya and NB4 (mixed at a molar  
96 ratio of 1:1.5), in the presence of 0.5 mM MANT-GTP (a non-cyclizable nucleotide-derived AC  
97 inhibitor), and 5 mM  $\text{MnCl}_2$ . The sample was subjected to cryo-EM imaging and single particle  
98 analysis (Fig. S2), yielding a 3D reconstruction of the protein in C1 symmetry at 3.8 Å resolution  
99 (Fig. S2-3, Table S1).

100 The reconstruction revealed the full-length Cya arranged as a dimer bound to three copies of NB4  
101 nanobody: two copies bound symmetrically to the SOL portions of the Cya dimer, and one  
102 asymmetrically bound to the extracellular surface of the protein (Fig. S3). To visualize the details  
103 of the Cya-NB4 interaction, we crystallized the SOL construct in the presence of NB4 and solved  
104 the X-ray structure of the complex at 2.1 Å resolution (Fig. S4A, Table S2). The structure showed  
105 an extensive interaction interface between the negatively charged surface of the monomeric SOL  
106 domain and the NB4 (Fig. S4B). Interestingly, the crystallized construct did not form a native-like  
107 dimeric form of the enzyme, but nevertheless retained the ability to bind to MANT-GTP/ $\text{Mn}^{2+}$ ,  
108 with an unusual twist of the MANT-GTP base (Fig. S4C). The well-resolved structure of the Cya  
109 SOL-NB4 complex allowed us to reliably place NB4 into the cryo-EM density map (Fig. S3-4).

110 To improve the resolution of the cryo-EM density map in the regions of highest interest, we  
111 masked out the extracellular NB4 density and refined the Cya-NB4 dataset imposing the C2  
112 symmetry. This resulted in a 3D reconstruction at 3.57 Å resolution, which allowed us to reliably  
113 trace the polypeptide chain in the cryo-EM density map, covering residues 41-428 of the full-  
114 length Cya construct (Fig. 1E-F, Fig. S3, Table S1).

115 **Key features of the Cya structure.** Our 3D reconstruction revealed the previously unresolved  
116 portion of the protein, the 6-TM bundle, arranged into a homodimer (Fig. 1F, 2B, 2D). The SOL  
117 portion of the protein, linked to the TM region via the helical domain (HD), adopted a  
118 conformation consistent with our previous structure of the SOL domain of *M. intracellulare* Cya  
119 homologue (Fig. S4) (17). The two nucleotide binding sites of Cya are occupied with the molecules  
120 of MANT-GTP/ $\text{Mn}^{2+}$ , which we modelled based on the previous structures and the X-ray structure  
121 of SOL-NB4 complex (Fig. S4). The C1 and the C2 maps provide no clear evidence of asymmetry  
122 in the active site, which we have observed in the structure of *M. intracellulare* Cya (17). Therefore,  
123 the two MANT-GTP molecules were modelled in identical orientations.

124 The HD region is believed to be a critical element in the membrane and soluble ACs and GCs, as  
125 this region couples the N-terminal regulatory domains to the catalytic function of these proteins  
126 (23-25). In Cya, the HD extends from the TM6 (Fig. 2A-B), forming a coiled-coil observed in the  
127 structures of homologous proteins, including AC9 (Fig. 2C) (9) and sGC (23) (Fig. 3).  
128 Interestingly, the size difference between the HD helix in Cya and the HD1 and HD2 helices in  
129 AC9 leads to an ~90 rotation of the corresponding TM regions, relative to the catalytic domains  
130 (Fig. S5A). This may be an indication that the exact structural alignment of the TM domain and  
131 the relatively remote catalytic domain may not be a conserved feature of the membrane ACs.  
132 Instead, it is likely that the precise TM-HD and HD-catalytic domain coupling plays the key role  
133 in the formation and regulation of the catalytic center in the membrane AC, consistent with the  
134 function of the HD as a transducer element in the AC structure (26).

135 The resolved portion of the Cya N-terminus (residues V<sub>41</sub>ARRQR<sub>46</sub>), rich in positively charged  
136 residues, is immediately adjacent to the HD region. The early work on Cya identified the mutations  
137 in this region that disrupt the function of the protein (17), suggesting that the intact residues in the  
138 N-terminus stabilize the HD. Our structure provides the structural basis for understanding the  
139 likely disruptive effects of these mutations. The positively charged residues R43-R44 likely  
140 stabilize the negatively charged surface of the HD (Fig. S5B).

141 **The TM1-5 bundle as a rail for the HD helices.** The TM helices 4, 5 and 6 of Cya form an  
142 extensive dimer interface within the membrane (Fig. 2D). The dimer interface residues, close to  
143 the “core” of the protein, are relatively well conserved among the Cya homologues from  
144 Mycobacteria (Fig. S7), with relatively poorly conserved residues in TM1-3. A comparison of the  
145 6-TM bundle of Cya with the corresponding regions in the bovine AC9 (TM1-6 and TM7-12)  
146 shows that the helices TM1-5 (and TM7-11 for the AC9) form a well defined structural motif (Fig.  
147 2D-E). A striking difference between the Cya and AC9 membrane domains is that the TM region  
148 that forms the HD helix is swapped in AC9: the TM12 of AC9 occupies the same position as the  
149 TM6 of Cya. Similarly, TM6 in AC9 is placed in a corresponding position relative to the TM7-11  
150 (Fig. 2F-G). The TM1-5 bundle in Cya appears to act as a “guide rail” for the TM6/HD helix of  
151 Cya, guiding the correct assembly of the HD coiled coil and the catalytic domain of the cyclase  
152 (Fig. 3A). This feature is remarkably similar in AC9, with TM1-5 and TM7-11 arranged in a near-  
153 identical way (Fig. 3B), and with a closely matching HD core (Fig. 3D).

154 The previous experiments in *M. intracellulare* Cya have shown that the HD and the TM regions  
155 of the protein are critically important for the protein’s dimerization and functional assembly (17).  
156 The lack of the TM region results in failure to form a stable active dimer of *M. tuberculosis*  
157 Rv1625c / Cya, even in the presence of a nucleotide analogue MANT-GTP, judged by the inability  
158 of MANT-GTP to induce crystallization of the protein in a dimeric form (Fig. S4). In contrast, the  
159 soluble domain of the *M. intracellulare* Cya is effectively dimerized by MANT-GTP (17). The  
160 importance of the TM domain as a factor that promotes correct protein folding is further illustrated  
161 by the ability of the isolated Cya SOL construct to form an inactive domain-swapped dimeric  
162 assembly (27). It is thus tempting to suggest that the key function of the TM domain in a membrane  
163 AC is to guide the assembly of the enzyme in a catalytically competent form.

164 This may have important implications for AC regulation. In a related enzyme, the NO-sensing  
165 sGC, the heme-containing NO-receptor domain is fused to the HD region in place of the TM  
166 regions seen in Cya or in the mammalian AC9 (Fig. 3E-G). In its inactive form, the sGC displays  
167 a conformation where HD helices are bent, with an accompanying substantial unwinding of the  
168 helical domain core (Fig. 3E). Comparison of the Cya HD core with that of the sGC HD core  
169 highlights this discrepancy (Fig. 3F). In contrast, activation of sGC is accompanied with a large-

170 scale conformational change, “straightening” the HD (Fig. 3H) and adopting the HD conformation  
171 that closely matches that of Cya (Fig. 3H). The position of the “kink” in the HD of sGC  
172 approximately corresponds to the membrane-cytosol interface in Cya. Thus, the very distant yet  
173 related proteins sGC and Cya (as well as AC9 and other membrane ACs) may be subject to very  
174 similar modes of regulation involving changes in the HD, which may result in changes in the  
175 catalytic domain of the protein. While in sGC the process is guided by the heme-containing  
176 receptor domain, in the membrane ACs this function is likely performed by the TM domain.

177 **The TM domain of Cya as a putative receptor module.** The structure of Cya revealed several  
178 prominent cavities in the TM domain of the protein, which may serve a stabilizing or regulatory  
179 role (Fig. 4). A negatively charged cleft (site Ex1) is formed at the extracellular interface of the  
180 two 6-TM bundles (Fig. 4A, D, E). The negative charge of this pocket is provided by the residues  
181 D123, E164 and D170 of each monomer, facing into the cavity (Fig. 4E). This region may be  
182 involved in binding of positively charged ions, small molecules, lipids or peptides. The ability of  
183 NB4 nanobody to interact with this pocket spuriously indicates that it may also be a site of  
184 interaction with a yet unknown natural protein partner.

185 Additionally, a prominent pocket open to the extracellular side of the protein is formed within each  
186 TM bundle (site Ex2; Fig. 4A, C-D). This pocket may accommodate small molecules or lipids,  
187 with a possible access route from the outer leaflet of the lipid bilayer surrounding Cya. A similar  
188 internal pocket is present in the TM1-6 bundle in AC9 (Fig. S8). Deep pockets on the cytosolic  
189 side of the Cya TM region are formed between the HD domain and the N-terminus/TM1 (site  
190 Cy1), as well as between TM1-3 (site Cy2; Fig. 4B-D). The entrances into these pockets are lined  
191 by positively charged residues R43, R44, R46 of the N-terminus, as well as R203 and R207 in the  
192 HD domain from the adjacent monomer (Fig. 4B-D). The positive charge of this region indicates  
193 a potential role in interactions with the phospholipid headgroups or positively charged peptides or  
194 small molecules. The interpretation of these cytosolic intramembrane pockets requires caution, as  
195 the residues 1-40 of Cya are not resolved in our 3D reconstruction but may interact with and  
196 occlude these pockets. Analysis of the sites Ex2-Cy2 shows that they are discontinuous, precluding  
197 formation of a channel traversing the entire width of the membrane (Fig. 4D). Our MD simulations  
198 confirmed the ability of water molecules to enter into the Ex2 and Cy2 site, but no transmembrane  
199 water transport could be observed (Fig. S9F). Thus, while the pockets Ex2 and Cy2 provide support  
200 to the hypothesis of the AC TM domain as a receptor, any translocation events would have to  
201 involve substantial conformational rearrangements opening the connection between the two sites.

202 Our density map features a small but prominent density in the site Ex1 (Fig. 4E, Fig. S6), which  
203 presently can not be assigned to a specific entity, but which could correspond to a bound metal  
204 ( $\text{Na}^+$ ,  $\text{Mg}^{2+}$ ,  $\text{Mn}^{2+}$  or a yet unknown component co-purified with the protein from *E. coli*). It is  
205 conceivable that disruption of this negatively charged interface may lead to the loss of the rail  
206 structure of the TM region, with concomitant changes in the HD helix arrangement and ultimately  
207 the catalytic domain of Cya. To test the behavior of this site, we performed molecular dynamics  
208 (MD) simulations (Fig. S9). The site Ex1 behaved as a genuine metal binding site, occupied by  
209 the  $\text{K}^+$  and  $\text{Mg}^{2+}$  ions similarly to the metal binding site in the Cya catalytic center over the course  
210 of the simulation (Fig. S9B-E). Thus, the evidence obtained experimentally and using MD  
211 simulations strongly supports a function of the extracellular surface of Cya as a receptor for  
212 positively charged ligands.

213 **The Ex1 site controls the helical and catalytic domain.** To test the role of the Ex1 site  
214 experimentally, we mutated the polar residues lining this site (T122, D123, Q127, E164 and D170)  
215 to Ala (Fig. 5A-C). The resulting construct (referred to as Ex1-5A, Fig. 5A, C) was successfully

216 expressed and purified in digitonin (Fig. S10A). The thermostability profiles of the Ex1-5A mutant  
217 in the absence or in the presence of a nucleotide were similar to those of the wild-type Cya (Fig  
218 5D, Fig. S10B-C). In contrast, the enzymatic activity of Ex1-5A was substantially reduced (with  
219 a dramatic increase in apparent  $K_m$ , Fig. 5E), with a 4-fold reduction in apparent affinity for a  
220 nucleotide inhibitor, MANT-GTP (judged by the MANT-GTP  $IC_{50}$  values, Fig. 5F).

221 To investigate the effects of the Ex1-5A mutant on Cya structure, we performed limited  
222 proteolysis-coupled mass spectrometry (LiP-MS) experiments on both the wild-type and the  
223 mutant in the absence of added nucleotides, and compared the peptides obtained by pulse  
224 proteolysis with proteinase K (PK) (Fig. 5G). Comparative analysis of the LiP-MS profile of the  
225 wild-type Cya and the Ex1-5A mutant revealed a significant increase in protease accessibility of  
226 the HD in the mutant (Fig. 5G-H). Thus, modification of the extracellular site Ex1 of Cya leads to  
227 changes in the dynamics of its cytosolic HD, accompanied by a dramatic reduction in enzymatic  
228 activity.

229

## 230 Discussion

231 The cryo-EM structure of *M. tuberculosis* Cya provides a unique insight into the assembly and  
232 regulation of a model membrane AC. To this day, the functional role of the TM region in the  
233 polytopic membrane AC, such as Cya or the mammalian AC1-9, remains elusive. Why does a cell  
234 need an AC with such an elaborate membrane anchor? A lipid anchor or a single TM helix would  
235 be sufficient to target the catalytic domain to the membrane compartment where cAMP production  
236 is required. Our structure provides two possible reasons for the ACs to have such a TM domain:  
237 (i) to facilitate the assembly of the HD domain, (ii) to act as a receptor module, binding ligands at  
238 several newly identified putative ligand binding sites, including the pockets within the Cya  
239 monomers and at the Cya-Cya interface (Fig. 6). The two functions are not mutually exclusive, as  
240 the ligand interactions with the membrane region of the AC may influence the HD assembly and  
241 thus regulate the cyclase function. Previous work utilizing chimeric constructs composed of  
242 fragments of the quorum sensing receptor CqsS from *Vibrio harveyi* and Cya (20) or mammalian  
243 membrane ACs (28) revealed that the membrane anchors of the ACs may act as orphan receptors  
244 for yet unknown ligands. Together with the proposed functional coupling between the TM domain  
245 and the catalytic site of Cya, the structure described here is consistent with these findings, offering  
246 molecular insights into the potential receptor role of the membrane anchor of a model membrane  
247 AC.

248 Our experimental results and simulations point to a possible link between the enzymatic activity  
249 of Cya and binding of small cations (such as metals ions) to its Ex1 site. It is possible that transient  
250 interactions of cations with protein surfaces play a basic role in surface charge compensation.  
251 However, the properties of the Ex1 site are strongly suggestive of a specific ligand binding site,  
252 with a cluster of ten polar residues (six negatively charged residues) at the Cya dimer interface  
253 pointing towards the Ex1 cavity. The most telling evidence for the role of this site in cation binding  
254 is the MD simulation, which revealed two locations on the Cya surface where the metal ions dwell:  
255 the established metal binding site in the catalytic pocket, and the site Ex1. Modification of the  
256 charges of the Ex1 by mutagenesis reduced the activity of the protein, further suggesting that this  
257 site at the extracellular surface of the protein likely plays a pivotal role in controlling the assembly  
258 of the catalytically active dimeric Cya.

259 The presence of potential ligand binding pockets at the extracellular surface of Cya lends strong  
260 support to the long-standing idea that the TM domains of the ACs may act as receptor modules for

261 yet unknown ligands (20). The possibility of direct regulation of cAMP production via the  
262 membrane anchors of the ACs would have long-reaching consequences: a vast repertoire of  
263 pharmacological agents on the market today act via GPCRs coupled to membrane ACs (29). Direct  
264 modulation of the cAMP production through the AC membrane domains could revolutionize the  
265 approaches to drug development for a wide range of diseases where the GPCRs are currently the  
266 primary drug targets. A related notion of importance for molecular pharmacology and medicinal  
267 chemistry is the potential interactions between the already existing drugs and the membrane  
268 domains of the ACs. Such interactions may lead to unwanted side-effects associated with cAMP  
269 signaling, such as emesis and changes in heart rate and contractility (30). An example of this is the  
270 antifungal drug miconazole, which is known to have cardiotoxic effects (31, 32). Miconazole has  
271 recently been shown to directly activate AC9, likely via its TM domain (33). The interaction with  
272 AC9 may contribute to the cardiorespiratory side-effects of this drug. Similar interactions  
273 involving other drug / AC combinations may have to be systematically evaluated, especially in the  
274 cases where changes in cAMP levels or in the downstream signaling events are recognized as side-  
275 effects.

276 In the absence of known interaction partners for the membrane regions of the ACs it is difficult to  
277 predict the effect of ligand binding to any of the pockets we find in the Cya structure. Nevertheless,  
278 the structure hints at ways that could be exploited by various agents to affect the AC activity via  
279 the membrane domain. The closest example of cyclase modulation through the receptor-mediated  
280 effect on the HD helices is the case of soluble GC, described at atomic resolution, has been detailed  
281 above (Fig. 3) (23). The presence of disease-linked mutations in the HD regions of AC5 (34, 35)  
282 and retGC1 (36, 37) underscore the importance of this domain for cyclase structure and function.  
283 It is clear that the HD region plays a vital part in AC and GC assembly and stability. This is evident  
284 from our experiments with the *M. intracellulare* Cya (17), as well as the results of others using  
285 Cya and mammalian ACs as model enzymes (10, 26, 28). It remains to be determined whether any  
286 agents can elicit conformational changes in the membrane domain of Cya (or in any of the  
287 mammalian membrane ACs), leading to substantial changes in the HD similar in scale to the  
288 changes observed in the sGC during its activation. Our MD simulations and the experiments with  
289 the Ex1-5A mutant of Cya are suggestive of a receptor-transducer-catalyst relay, where the  
290 extracellular portion of the TM region acts as a “receptor” for a yet unknown ligand, the HD  
291 transduces the activation, and the catalytic domain catalyses ATP to cAMP conversion. This notion  
292 is further supported by previous work on Cya that identified the HD region as a transducer of a  
293 putative signal (20, 26). The structure of Cya can serve as a starting point for exploration of the  
294 TM domain-mediated regulation of membrane ACs.

295



296

## Materials and Methods

297

### Protein expression and purification

298

*Expression and purification of the full-length Cya.* Cya cloned into a vector with an N-terminal strep tag and a 3C cleavage tag was expressed in *E. coli* BL21(DE3)RIPL cells grown in TB medium. Protein expression was induced when at OD<sub>600</sub> of 3.0 using 0.3 mM IPTG. After 3 hours of induction the cells were harvested. The membranes were prepared using cells lysis by three passes in Emusiflex high pressure homogenizer in a buffer containing 50 mM Tris pH 7.5, 200 mM NaCl, 5 µg/ml DNase and 1 mM PMSF. Lysed cells were centrifuged at 12000 rpm using a Ti45 rotor for 30 mins. The resulting supernatant was spun down by ultracentrifugation using Ti45 rotor at 40000 rpm for 1 hour, re-suspended in a buffer containing 50 mM Tris pH 7.5 and 200 mM NaCl and ultracentrifuged again. The resulting membrane pellet was resuspended in the same buffer, flash-frozen and stored at -80°C until purification.

307

For purification, the membranes were thawed and resuspended in a buffer containing 50 mM Tris pH 7.5, 200 mM NaCl, 10% glycerol and 1% sol-grade dodecylmaltoside (DDM, Anatrace), mixed at 4°C for 1 hour and ultracentrifuged. The supernatant was incubated with Strep-tactin superflow resin for 1 hour at 4°C. The resin was washed with a volume 25 times that of the resin bed of a buffer containing 0.1% digitonin and the eluted with 5 mM desthiobiotin. The eluted protein was concentrated and injected onto Superose 6 Increase column pre-equilibrated with a buffer containing 50 mM Tris pH 7.5, 200 mM NaCl 0.1% digitonin and 10% glycerol. For Cryo-EM samples glycerol was omitted during size exclusion chromatography step.

315

*Cya-SOL expression and purification.* Cya-SOL construct was generated by cloning the sequence encoding the Cya residues 203-433 into a vector with an N-terminal 10xHis tag followed by a 3C cleavage site. The construct was expressed in *E. coli* BL21(DE3)RIPL cells grown in TB medium. Expression was carried out under conditions similar to those used for expression of the full-length protein, with a 5-hour induction at 20°C. The cells were collected by centrifugation, lysed and the cleared lysate was incubated with Ni-NTA resin for 1 hour. The resin was washed with a volume 15 times the resin bed volume of wash buffer containing 50 mM Tris pH 7.5, 200 mM NaCl, 10% glycerol and 20 mM imidazole, followed by an additional wash step with a volume of 25 times the volume of the resin bed volume with a buffer containing 50 mM imidazole. The protein was eluted with a buffer containing 250 mM imidazole, concentrated and desalted using a GE PD-10 Sephadex G-25 desalting column. The protein was mixed with 3C protease (1/50 w/w) and incubated at 4°C overnight. The protein was passed through pre-equilibrated Ni-NTA resin to remove the 3C protease and purified by SEC using Superdex 200 Increase column.

327

328

### Nanobody library generation and selections

329

To generate desired immune response in heavy chain-only IgG subclass, an alpaca was immunized four times in two-week intervals, each time with 200 µg purified Rv1625c in PBS containing 0.02% (w/v) β-DDM. The antigen was mixed in a 1:1 (v/v) ratio with GERBU Fama adjuvant (GERBU Biotechnik GmbH, Heidelberg, Germany) and injected subcutaneously in 100 µL aliquots into the shoulder and neck region. Immunizations of alpacas were approved by the Cantonal Veterinary Office in Zurich, Switzerland (animal experiment licence nr. 172/2014). One week after the last injection, 60 mL of blood was collected from jugular vein for isolation of lymphocytes (Ficoll-Paque® PLUS, GE Healthcare Life Sciences, and Leucosep tubes, Greiner). Approx. 50 mio. cells were used to isolate mRNA (RNeasy Mini Kit, Qiagen) that was reverse transcribed into cDNA (AffinityScript, Agilent, US) using the gene specific primer. The VhH (nanobody) repertoire was amplified by PCR and phage library was generated by fragment exchange cloning (22) into a PmlI-linearized pDX phagemid vector. The resulting VhH-phage library (size 4.5 e6) was screened by biopanning against the immobilized target. For that purpose VI23.60 containing Strep-tag® was immobilized on the Strep-Tactin® coated microplate (IBA Lifesciences GmbH, Germany) and three rounds of selection were performed. 195 single clones from the enriched nanobody library were induced to express polyhistidine-tagged soluble nanobodies in the bacterial periplasm and analysed by

343

344 ELISA for binding to the target. 96 ELISA-positive clones were Sanger sequenced and grouped in 17  
345 families according to their CDR3 length and sequence (22).

346

#### 347 Nanobody expression and purification

348 Nanobody NB4 was expressed in BL21(DE3)RIPL cells in TB medium supplemented with 2 mM  
349 magnesium chloride and 0.1% glucose by induction at an OD<sub>600</sub> of 0.7 using 1 mM IPTG at 26°C for 16  
350 hours. The periplasmic fraction was isolated by resuspending the cell pellet in 2.5x w/v cold TES buffer  
351 (200 mM Tris pH 8.0, 0.5 mM EDTA and 0.5 mM sucrose and 1 mM PMSF) for 45 mins, followed by an  
352 overnight incubation with twice the amount of a 4-fold diluted TES buffer. The suspension was spun down  
353 and the supernatant was used for protein purification with Ni-NTA resin, following the same procedure as  
354 that used for Cya-SOL. The eluted nanobody was concentrated and further purified using SEC with a  
355 Superdex 200 Increase column.

356

#### 357 Adenylyl cyclase activity assay

358 Adenylyl cyclase activity assays were performed as described previously (17). In brief, the assay was  
359 carried out in a reaction volume of 200 µl with 50mM Tris pH 8.0, 200 mM NaCl, 5 mM MgCl<sub>2</sub> 5 mM  
360 MnCl<sub>2</sub> and 0.1% digitonin. For determination of K<sub>m</sub>, ATP concentration was varied from 0 to 1000 mM in  
361 presence of 10 nM [<sup>3</sup>H]ATP (PerkinElmer). The reaction was initiated by adding ATP to the reaction  
362 solution containing 0.005 mg/ml Cya, 0.0075 mg/ml NB4, followed by an incubation for 10 min at 30°C.  
363 The reaction was stopped by incubating the reaction mixture at 95°C for 4 minutes and by addition of 20 µl  
364 of 2.2 M HCl. The stopped reactions were applied to 1.3 g of aluminum oxide in disposable columns. The  
365 cAMP was eluted with 4 ml of 100 mM ammonium acetate into scintillation vials and mixed with 12 ml  
366 scintillation liquid (Ultima Gold). The amount of radioactive cAMP was measured using a liquid  
367 scintillation counter. The activity assays for Cya-SOL were performed identically, using 0.08 mg/ml Cya-  
368 SOL in an assay.

369

#### 370 Isothermal titration calorimetry

371 The isothermal titration calorimetry (ITC) experiments were performed using a Microcal ITC200  
372 instrument with cell temperature maintained at 25°C and with stirring set to 750 RPM. In total, 15 injections  
373 were performed per experiment with each injection set at 2 µl and a pre-injection volume of 0.8 µl. Cya-  
374 SOL was kept in the cell at a concentration of 30 µM and NB4 was kept in the syringe at 300 µM. All ITC  
375 measurements were performed in triplicates. The results were analyzed using sedphat and NITPIC. The  
376 figures describing the ITC results were generated using GUSI (38).

377

#### 378 Protein thermal unfolding

379 Protein thermal stability was measured using nanoDSF on a Prometheus panta instrument (NanoTemper)  
380 (39). The protein was measured at 0.5 mg/ml concentration in a buffer containing 50mM Tris pH 7.5, 200  
381 mM NaCl and 0.1% digitonin, using NT.48 capillaries. For samples with ligand, 1mM ATPαS and 5 mM  
382 MgCl<sub>2</sub> was added and allowed to incubate at RT for 10 minutes. The samples were spun at 13000 g on a  
383 tabletop centrifuge for 1 minute before measuring. Thermal unfolding experiments were carried out at a  
384 temperature increment of 1°C/min in triplicates. T<sub>m</sub> was calculated as the first derivative of intrinsic protein  
385 emission ratio at 350 nM and 330nM using PR.Panta analysis software.

386

#### 387 Cryo-EM sample preparation

388 For Cryo-EM sample preparation, freshly purified full-length Cya in 0.1% digitonin was concentrated and  
389 mixed with NB4 at a molar ratio of 1:1.5. Additionally, 5 mM MnCl<sub>2</sub> and 0.5 mM MANT-GTP were added  
390 and the mixtures were incubated on ice for 30 minutes. The final concentration of Cya was 5-6 mg/ml. An  
391 aliquot of 3.5 µl of sample was placed on the glow-discharged cryo-EM grid (Quantifoil R1.2/1.3 or  
392 Quantifoil R2/1), blotted and plunge-frozen in liquid ethane using a Mark VI Vitrobot instrument  
393 maintained at 100% humidity with blot force 20 and blot time of 3 seconds. The grids were cryo-transferred  
394 for storage in liquid nitrogen.

395

#### 396 Cryo-EM data acquisition and image analysis

397 The cryo-EM data were obtained at the SCOPeM facility at ETHZ using a 300 kV Titan Krios electron  
398 microscope (FEI) equipped with a K3 direct electron detector with a pixel size of 0.33 Å/pix (in super-  
399 resolution mode), at a defocus range of -0.5 to -3.0 µm. All movies were dose fractionated into 40 frames.  
400 The movies for dataset 1 were recorded with a total dose of 54 e-/Å<sup>2</sup>, dataset 2 - with a dose of 47 e-/Å<sup>2</sup>,  
401 and for dataset 3 - a dose of 44 e-/Å<sup>2</sup>.

402 All data processing was performed in relion 3.0 (40). All micrographs were motion corrected using  
403 motioncorr 1.2.0 (41) and binned two-fold. All micrographs were CTF corrected using Gctf (42). Particles  
404 were autopicked using templates from manual picking. In total 1692104 particles were picked for data set  
405 1, 1898968 particles for data set 2 and 990286 particles for data set 3. After several rounds of 2D  
406 classification, data set 1, 2 and 3 were left with 253789, 1173076 and 741081 particles respectively. 3D  
407 Classification with four classes was used to further process each dataset, with C1 and C2 symmetry  
408 imposed. The particles from the best classes in each data set were chosen and further refined. The  
409 extracellular density for NB4 was masked out for all subsequent refinements to generate refined 3D maps  
410 at a resolution of 4.37 Å (dataset 1), 4.25 Å (dataset 2) and 4.61 Å (dataset 3) in C2 symmetry. The particles  
411 were merged into a single selection and subjected to refinement, ctf refinement and particle polishing,  
412 yielding a final refined map of 3.57 Å resolution (C2 symmetry). The same particle selection produced a  
413 reconstruction at 3.83 Å resolution without symmetry imposed (C1). Model building was performed in coot  
414 (43). The model was refined using phenix.real\_space\_refine in Phenix (44). For model validation the model  
415 atoms were randomly displaced (0.5 Å), and the resulting model refined using one of the refined half maps  
416 (half-map1). Map vs model FSC was calculated using the model against the corresponding half-map1 used  
417 for refinement, and for the same model versus the half-map2 (not used in refinement) (45). Model geometry  
418 was assessed using MolProbity (46).

419

#### 420 Protein crystallization, X-ray data collection, processing and structure determination

421 Crystallization of Cya-SOL-NB4 complex was performed using standard vapour diffusion techniques at  
422 20°C. Concentrated protein complex was prepared by mixing purified Rv1625c and NB4 in 1:1.2 ratio in a  
423 buffer of the following composition: 20 mM Tris-HCl pH 7.5, 150 mM NaCl, 5 mM MnCl<sub>2</sub> and 1 mM  
424 MANT-GTP. This protein solution was used to set up 96-well sitting drop crystallization trials using TPP  
425 Mosquito LCP robot. Formulatrix Rockimager was used to visualize crystal formation. Multiple crystal hits  
426 were obtained, and selected conditions were used as starting points for further crystal optimizations. The  
427 optimal crystals were obtained after mixing 1.5 µl of protein (20 mg/ml) with 1.5 µl of reservoir solution  
428 (0.1 M Na-acetate pH 5.5, 0.02 M CaCl<sub>2</sub>, 30% MPD). The crystals were gently transferred to cryoprotectant  
429 consisting of 0.05 M Na-acetate pH 5.5, 0.01 M CaCl<sub>2</sub>, 35% MPD, and crystals were subsequently mounted  
430 onto crystal loop (Hampton Research) and flash frozen in liquid nitrogen.

431 X-ray data collection was performed at the PXI and PXIII beamlines at the Swiss Light Source synchrotron  
432 in Villigen, Switzerland. The best dataset was collected to 1.97 Å resolution from a single crystal at  
433 cryogenic temperature (100 K) using Eiger detector with oscillation range of 0.1°. The data was processed  
434 using MOSFLM and XDS (47, 48). The resolution cutoff was chosen taking into account the values of  
435 CC1/2 and mean I/sigma(I) (49). Phasing/refinement was performed using Phenix (44). Phases were

436 resolved by molecular replacement (MR) using templates (cya: 5O5K, nanobody: 6FPV). Coot was used  
437 for model building and geometrical optimization (43). Crystallographic data collection and refinement  
438 statistics are shown in Table S2.

439

#### 440 Molecular dynamics (MD) simulations

441 The MD simulations were performed using CHARMM36m force field in GROMACS 2019.3 (50). The  
442 missing N- and C-terminus of Cya were modelled using I-TASSER server (51), and the protein was inserted  
443 into lipid membrane, solvated and ionized using the Membrane Builder tools in CHARMM-GUI (52). Lipid  
444 membrane composed of 60 POPC, 40 POPG, 40 POPE, 20 POPI, 20 DLGL and 20 cholesterol molecules.  
445 The system was solvated with TIP3 water molecules extended to 25 Å from the edge of the protein and  
446 with per lipid hydration number of 50. Subsequently the system was neutralized with Cl<sup>-</sup> ions, and then was  
447 brought to a final concentration of 0.15 M KCl or 0.15 M MgCl<sub>2</sub>. All of the generated systems were  
448 subjected to energy minimization, and 6-step NVT and NPT equilibration using the default scheme  
449 provided in the CHARMM-GUI (3), followed by 200 ns of a production run. Final trajectories were analyzed  
450 using tools in available the GROMACS package. The Volmap tool in VMD (53) was used for generating  
451 occupancy/density maps. The figures related to the MD simulations were prepared using VMD or Pymol.

452

#### 453 Limited proteolysis-coupled mass spectrometry

454 Wild-type and mutant Cya protein preparations were diluted in LiP buffer (1 mM MgCl<sub>2</sub>, 150 mM KCl,  
455 100 mM HEPES-KOH pH 7.4) with 0.1% digitonin. Mutant and wild-type samples were split into 8  
456 samples each at a protein amount of 2 µg of protein per 50 µL of buffer. Four out of eight WT and mutant  
457 samples were treated with proteinase K from *Tritirachium album* (Sigma Aldrich) (limited proteolysis,  
458 LiP), whereas the other four were treated with water instead (TC). The samples were incubated in a  
459 Thermocycler for 5 minutes at 25°C. Proteinase K was inactivated by heating the samples to 99°C for 5  
460 minutes, then incubating them at 4°C for 5 minutes, followed by the addition of the same volume of 10%  
461 sodium deoxycholate. LiP and TC underwent the same procedures.

462 *Tryptic digest.* Following the addition of sodium deoxycholate, disulfide bonds were reduced by adding  
463 tris(2-carboxyethyl)phosphine to a final concentration of 5 mM and incubating the samples at 37°C for 40  
464 minutes with slight agitation. Free cysteine residues were alkylated with iodoacetamide at a final  
465 concentration of 40 mM and 30 minutes of incubation at room temperature in the dark with slight agitation.  
466 The samples were diluted with 100 mM ammonium bicarbonate to a final sodium deoxycholate  
467 concentration of 1 %. Lysyl endopeptidase LysC was added at an enzyme to substrate ratio of 1:50 and  
468 samples were incubated for one hour at 37°C with slight agitation. Next, trypsin was added at an enzyme  
469 to substrate ration of 1:50 and incubated at 37°C overnight with slight agitation. The digestion was stopped  
470 by adding 50% formic acid to the samples to achieve a final concentration of 2% formic acid. Precipitated  
471 sodium deoxycholate was removed by filtering through a Corning® 2 µM PVDF plate and samples were  
472 further desalted on a 96-well MacroSpin plate (The Nest Group). Peptides were eluted with 80%  
473 acetonitrile, 1% formic acid and dried in a vacuum centrifuge. After drying, samples were reconstituted in  
474 20 µL 0.1% formic acid and iRT peptides (Biognosys) were added.

475 *LC-MS/MS data acquisition.* Samples were measured on an Orbitrap Exploris™ 480 mass spectrometer  
476 (Thermo Fisher), equipped with a nanoelectrospray source and an Easy-nLC 1200 nano-flow LC system  
477 (Thermo Fisher). 1 µL of digest was injected and separated on a 40 cm x 0.75 i.d. column packed in-house  
478 with 1.9 µm C18 beads (Dr. Maisch Reprosil-Pur 120) using a linear gradient from 3 to 35 % B (eluent A:  
479 0.1% formic acid, eluent B: 95% acetonitrile, 1% formic acid). Gradient duration was 30 minutes, whereas  
480 the whole method was 60 minutes long. Samples were measured at a constant flowrate of 300 nL/min while  
481 the column was heated to 50°C. All samples were acquired in DIA (41 windows, 1 m/z overlap) and  
482 analyzed in Spectronaut v15 (Biognosys). Further data analysis was carried out in R using mainly the R  
483 package protti (54). Briefly, the abundances of Rv1625c mutant and wild type were compared in the tryptic

484 controls and the protein abundances in the LiP-samples were corrected accordingly. Statistical testing on  
485 peptide level to detect peptide abundance differences was conducted employing the proDA (55) algorithm,  
486 implemented in protti. The Rv1625c PDB file was edited and the b-factors were replaced with the maximum  
487 absolute value of the calculated  $\log_2(\text{fold change})$  at each position. In pyMOL the protein was then colored  
488 according to the replaced b-factors to highlight regions changing regions.

489 *LiP-MS data interpretation.* Whether a peptide decreases or increases in abundance is dependent on the  
490 accessibility of the native protein to PK. In a standard LiP-MS experiment, three peptide types can be  
491 detected, dependent on the proteolytic cleavage:

- 492 - Semi-tryptic peptides are generated by a cleavage of PK on either the N-terminal or the C-terminal
- 493 side of the peptide and a cleavage by trypsin on the respective other side.
- 494 - Tryptic peptides are not cleaved by PK at all.
- 495 - Non-tryptic peptides were cleaved by PK on both sides.

496

497 Depending on the peptide type an increase or decrease in abundance can be interpreted in different ways.  
498 A tryptic peptide that decreases in abundance was additionally cleaved by PK, hence it disappears. This  
499 likely means that the protein region became more accessible to PK. On the other hand, a tryptic peptide that  
500 decreases in abundance can be interpreted as the region becoming less accessible to PK. A semi-tryptic  
501 peptide that increases in abundance can be explained as the protein region cleaved by PK becoming more  
502 accessible. A semi-tryptic peptide that decreases in abundance can be explained in two different ways:  
503 either the protein region became more protected, hence inaccessible to PK, or the protein region became  
504 more accessible and the peptide was not detected because of additional PK cleavage sites that were  
505 introduced with the conformational change.

506

507

## References and Notes

508

509

510

511

512

513

514

515

516

517

518

519

520

521

522

523

524

525

526

527

528

529

530

531

532

533

534

535

536

537

538

539

540

541

542

543

544

545

546

547

548

549

550

551

552

1. J. U. Linder, Class III adenylyl cyclases: Molecular mechanisms of catalysis and regulation. *Cellular and Molecular Life Sciences* **63**, 1736-1751 (2006).
2. P. Sassone-Corsi, The cyclic AMP pathway. *Cold Spring Harb Perspect Biol* **4**, (2012).
3. M. L. Halls, D. M. Cooper, Regulation by Ca<sup>2+</sup>-signaling pathways of adenylyl cyclases. *Cold Spring Harb Perspect Biol* **3**, a004143 (2011).
4. M. L. Halls, D. M. F. Cooper, Adenylyl cyclase signalling complexes – Pharmacological challenges and opportunities. *Pharmacology and Therapeutics* **172**, 171-180 (2017).
5. U. B. Kaupp, R. Seifert, Cyclic nucleotide-gated ion channels. *Physiol Rev* **82**, 769-824 (2002).
6. J. de Rooij *et al.*, Epac is a Rap1 guanine-nucleotide-exchange factor directly activated by cyclic AMP. *Nature* **396**, 474-477 (1998).
7. R. F. Schindler, T. Brand, The Popeye domain containing protein family--A novel class of cAMP effectors with important functions in multiple tissues. *Prog Biophys Mol Biol* **120**, 28-36 (2016).
8. K. Yan, L. N. Gao, Y. L. Cui, Y. Zhang, X. Zhou, The cyclic AMP signaling pathway: Exploring targets for successful drug discovery (review). *Molecular Medicine Reports* **13**, 3715-3723 (2016).
9. C. Qi, S. Sorrentino, O. Medalia, V. M. Korkhov, The structure of a membrane adenylyl cyclase bound to an activated stimulatory G protein. *Science* **364**, 389-394 (2019).
10. Y. L. Guo, T. Seebacher, U. Kurz, J. U. Linder, J. E. Schultz, Adenylyl cyclase Rv1625c of *Mycobacterium tuberculosis*: a progenitor of mammalian adenylyl cyclases. *EMBO J* **20**, 3667-3675 (2001).
11. G. Bai, G. S. Knapp, K. A. McDonough, Cyclic AMP signalling in mycobacteria: Redirecting the conversation with a common currency. *Cellular Microbiology* **13**, 349-358 (2011).
12. P. D. Townsend *et al.*, Stimulation of mammalian G-protein-responsive adenylyl cyclases by carbon dioxide. *Journal of Biological Chemistry* **284**, 784-791 (2009).
13. R. M. Johnson *et al.*, Chemical activation of adenylyl cyclase Rv1625c inhibits growth of *Mycobacterium tuberculosis* on cholesterol and modulates intramacrophage signaling. *Molecular Microbiology* **105**, 294-308 (2017).
14. B. C. VanderVen *et al.*, Novel Inhibitors of Cholesterol Degradation in *Mycobacterium tuberculosis* Reveal How the Bacterium's Metabolism Is Constrained by the Intracellular Environment. *PLoS Pathogens* **11**, 1-20 (2015).
15. K. M. Wilburn, R. A. Fieweger, B. C. VanderVen, Cholesterol and fatty acids grease the wheels of *Mycobacterium tuberculosis* pathogenesis. *Pathog Dis* **76**, (2018).
16. A. D. Ketkar, A. R. Shenoy, U. A. Ramagopal, S. S. Visweswariah, K. Suguna, A structural basis for the role of nucleotide specifying residues in regulating the oligomerization of the Rv1625c adenylyl cyclase from *M. tuberculosis*. *Journal of Molecular Biology* **356**, 904-916 (2006).
17. I. Vercellino *et al.*, Role of the nucleotidyl cyclase helical domain in catalytically active dimer formation. *Proceedings of the National Academy of Sciences*, 201712621-201712621 (2017).
18. J. H. Weber *et al.*, Adenylyl cyclases from *Plasmodium*, *Paramecium* and *Tetrahymena* are novel ion channel/enzyme fusion proteins. *Cell Signal* **16**, 115-125 (2004).

- 553 19. G. M. Avelar *et al.*, A rhodopsin-guanylyl cyclase gene fusion functions in visual  
554 perception in a fungus. *Curr Biol* **24**, 1234-1240 (2014).
- 555 20. S. Beltz, J. Bassler, J. E. Schultz, Regulation by the quorum sensor from *Vibrio* indicates  
556 a receptor function for the membrane anchors of adenylyl cyclases. *eLife* **5**, 1-17 (2016).
- 557 21. Q. Ding, R. Gros, J. Chorazyczewski, S. S. G. Ferguson, R. D. Feldman, Isoform-  
558 Specific Regulation of Adenylyl Cyclase Function by Disruption of Membrane  
559 Trafficking. *Molecular Pharmacology* **67**, 564-571 (2005).
- 560 22. E. R. Geertsma, R. Dutzler, A versatile and efficient high-throughput cloning tool for  
561 structural biology. *Biochemistry* **50**, 3272-3278 (2011).
- 562 23. Y. Kang, R. Liu, J. X. Wu, L. Chen, Structural insights into the mechanism of human  
563 soluble guanylate cyclase. *Nature* **574**, 206-210 (2019).
- 564 24. U. Scheib *et al.*, Rhodopsin-cyclases for photocontrol of cGMP/cAMP and 2.3 Å  
565 structure of the adenylyl cyclase domain. *Nat Commun* **9**, 2046 (2018).
- 566 25. M. Ohki *et al.*, Molecular mechanism of photoactivation of a light-regulated adenylyl  
567 cyclase. *Proc Natl Acad Sci U S A* **114**, 8562-8567 (2017).
- 568 26. M. Ziegler *et al.*, Characterization of a novel signal transducer element intrinsic to class  
569 IIIa/b adenylyl cyclases and guanylate cyclases. *FEBS J* **284**, 1204-1217 (2017).
- 570 27. D. Barathy, R. Mattoo, S. Visweswariah, K. Suguna, New structural forms of a  
571 mycobacterial adenylyl cyclase Rv1625c. *IUCr J* **1**, 338-348 (2014).
- 572 28. A. Seth, M. Finkbeiner, J. Grischin, J. E. Schultz, Gsalpha stimulation of mammalian  
573 adenylyl cyclases regulated by their hexahelical membrane anchors. *Cell Signal* **68**,  
574 109538 (2020).
- 575 29. K. Sriram, P. A. Insel, G Protein-Coupled Receptors as Targets for Approved Drugs:  
576 How Many Targets and How Many Drugs? *Mol Pharmacol* **93**, 251-258 (2018).
- 577 30. E. Parnell, T. M. Palmer, S. J. Yarwood, The future of EPAC-targeted therapies: agonism  
578 versus antagonism. *Trends Pharmacol Sci* **36**, 203-214 (2015).
- 579 31. V. Fainstein, G. P. Bodey, Cardiorespiratory toxicity due to miconazole. *Ann Intern Med*  
580 **93**, 432-433 (1980).
- 581 32. K. J. Won *et al.*, Antifungal miconazole induces cardiotoxicity via inhibition of APE/Ref-  
582 1-related pathway in rat neonatal cardiomyocytes. *Toxicol Sci* **126**, 298-305 (2012).
- 583 33. J. Simpson, A. Palvolgyi, F. A. Antoni, Direct stimulation of adenylyl cyclase 9 by the  
584 fungicide imidazole miconazole. *Naunyn Schmiedebergs Arch Pharmacol* **392**, 497-504  
585 (2019).
- 586 34. Y. Z. Chen *et al.*, Autosomal dominant familial dyskinesia and facial myokymia: single  
587 exome sequencing identifies a mutation in adenylyl cyclase 5. *Arch Neurol* **69**, 630-635  
588 (2012).
- 589 35. M. Carecchio *et al.*, ADCY5-related movement disorders: Frequency, disease course and  
590 phenotypic variability in a cohort of paediatric patients. *Parkinsonism Relat Disord* **41**,  
591 37-43 (2017).
- 592 36. C. L. Tucker *et al.*, Functional analyses of mutant recessive GUCY2D alleles identified  
593 in Leber congenital amaurosis patients: protein domain comparisons and dominant  
594 negative effects. *Mol Vis* **10**, 297-303 (2004).
- 595 37. X. Zhao *et al.*, A novel GUCY2D mutation in a Chinese family with dominant cone  
596 dystrophy. *Mol Vis* **19**, 1039-1046 (2013).
- 597 38. C. A. Brautigam, H. Zhao, C. Vargas, S. Keller, P. Schuck, Integration and global  
598 analysis of isothermal titration calorimetry data for studying macromolecular interactions.  
599 *Nat Protoc* **11**, 882-894 (2016).

- 600 39. A. O. Magnusson *et al.*, nanoDSF as screening tool for enzyme libraries and  
601 biotechnology development. *FEBS J* **286**, 184-204 (2019).
- 602 40. J. Zivanov *et al.*, New tools for automated high-resolution cryo-EM structure  
603 determination in RELION-3. *Elife* **7**, (2018).
- 604 41. S. Q. Zheng *et al.*, MotionCor2: anisotropic correction of beam-induced motion for  
605 improved cryo-electron microscopy. *Nat Methods* **14**, 331-332 (2017).
- 606 42. K. Zhang, Gctf: Real-time CTF determination and correction. *J Struct Biol* **193**, 1-12  
607 (2016).
- 608 43. P. Emsley, K. Cowtan, Coot: model-building tools for molecular graphics. *Acta*  
609 *Crystallogr D Biol Crystallogr* **60**, 2126-2132 (2004).
- 610 44. P. D. Adams *et al.*, PHENIX: a comprehensive Python-based system for macromolecular  
611 structure solution. *Acta Crystallogr D Biol Crystallogr* **66**, 213-221 (2010).
- 612 45. A. Amunts *et al.*, Structure of the yeast mitochondrial large ribosomal subunit. *Science*  
613 **343**, 1485-1489 (2014).
- 614 46. V. B. Chen *et al.*, MolProbity: all-atom structure validation for macromolecular  
615 crystallography. *Acta Crystallogr D Biol Crystallogr* **66**, 12-21 (2010).
- 616 47. W. Kabsch, Integration, scaling, space-group assignment and post-refinement. *Acta*  
617 *Crystallogr D Biol Crystallogr* **66**, 133-144 (2010).
- 618 48. A. G. W. Leslie, H. R. Powell. (Springer Netherlands, Dordrecht, 2007), pp. 41-51.
- 619 49. P. A. Karplus, K. Diederichs, Linking crystallographic model and data quality. *Science*  
620 **336**, 1030-1033 (2012).
- 621 50. C. Kutzner *et al.*, More bang for your buck: Improved use of GPU nodes for GROMACS  
622 2018. *J Comput Chem* **40**, 2418-2431 (2019).
- 623 51. J. Yang *et al.*, The I-TASSER Suite: protein structure and function prediction. *Nat*  
624 *Methods* **12**, 7-8 (2015).
- 625 52. S. Jo, T. Kim, V. G. Iyer, W. Im, CHARMM-GUI: a web-based graphical user interface  
626 for CHARMM. *J Comput Chem* **29**, 1859-1865 (2008).
- 627 53. W. Humphrey, A. Dalke, K. Schulten, VMD: visual molecular dynamics. *J Mol Graph*  
628 **14**, 33-38, 27-38 (1996).
- 629 54. J. Quast, D. Schuster, protti: Bottom-Up Proteomics and LiP-MS Quality Control and  
630 Data Analysis Tools. R package version 0.2.0. [https://CRAN.R-](https://CRAN.R-project.org/package=protti)  
631 [project.org/package=protti](https://CRAN.R-project.org/package=protti). (2021).
- 632 55. C. Ahlmann-Eltze, Differential Abundance Analysis of Label-Free Mass Spectrometry  
633 Data. R package version 1.4.0. (2020).
- 634 56. N. R. Voss, M. Gerstein, 3V: cavity, channel and cleft volume calculator and extractor.  
635 *Nucleic Acids Res* **38**, W555-562 (2010).

636  
637



638

639 **Acknowledgments:** We thank Emiliya Poghosyan and Elisabeth Müller-Gubler (EM Facility,  
640 PSI), and Miroslav Peterek (ScopeM, ETH Zurich) for their support in cryo-EM data collection.  
641 We also thank Spencer Bliven and Marc Caubet Serrabou (PSI) for support in high performance  
642 computing.

643

644 **Funding:**

645 Swiss National Science Foundation (150665; VMK)

646 Swiss National Science Foundation (176992; VMK)

647 Swiss National Science Foundation (184951; VMK)

648 Vontobel Stiftung (VMK)

649

650 **Author contributions:**

651 Conceptualization: VM, VMK

652 Methodology: VM, BK, DS, IV, SS, PP, VMK

653 Investigation: VM, BK, AK, DS, IK, TI, IV, VMK

654 Visualization: VM, BK, DS, VMK

655 Funding acquisition: VMK

656 Project administration: VMK

657 Supervision: PP, VMK

658 Writing – original draft: VM, VMK

659 Writing – review & editing: VM, BK, DS, PP, VMK

660

661 **Competing interests:** Authors declare that they have no competing interests.

662

663 **Data and materials availability:** The atomic coordinates and structure factors have been  
664 deposited in the Protein Data Bank (7YZ9, 7YZI, 7YZK); the density maps have been  
665 deposited in the Electron Microscopy Data Bank (EMD-14388, EMD-14389). The mass  
666 spectrometry data will be deposited at ProteomeXChange via PRIDE. All other data are  
667 available in the main text or the supplementary materials.

668

669 **Supplementary Materials**

670 Figs. S1 to S10

671 Tables S1 to S2

672

673

674

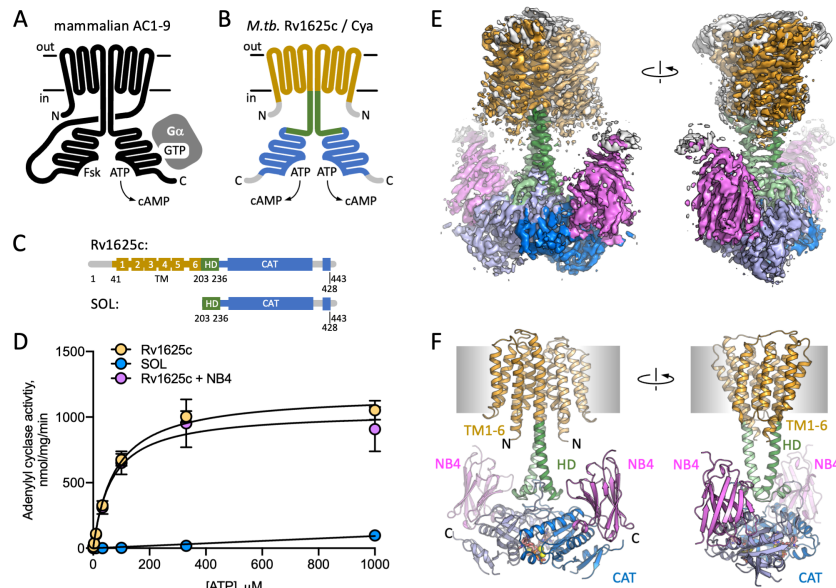

675

676

**Fig. 1. Structure of Cya-NB4 complex.** (A) Schematic representation of the mammalian membrane ACs, indicating the key elements of AC structure: 12 TM domains, two catalytic domains, an ATP and a forskolin (Fsk) binding site. The protein is depicted in a G protein-bound state. (B-C) A schematic representation of Rv1625c / Cya, illustrating the regions resolved in the cryo-EM structure. The TM region is coloured orange, the helical domain (HD) is green, the catalytic domain is blue. Regions absent in the cryo-EM structure are grey. (D) The activity of the full-length Cya in detergent is similar in the absence (yellow) and in the presence of nanobody NB4 (pink); the soluble domain of Cya (SOL, blue) shows low levels of activity. For all experiments the data are shown as mean  $\pm$  S.E.M. (n = 3). (E) The density map of Cya-NB4 complex at 3.57 Å resolution, obtained using masked refinement of the best dataset with c2 symmetry imposed. (F) The corresponding views of the atomic model of Cya-NB4 complex, coloured as in B-C. “N” indicates the N-terminal part of the protein; “HD” – helical domain; “CAT” – catalytic domain.

690

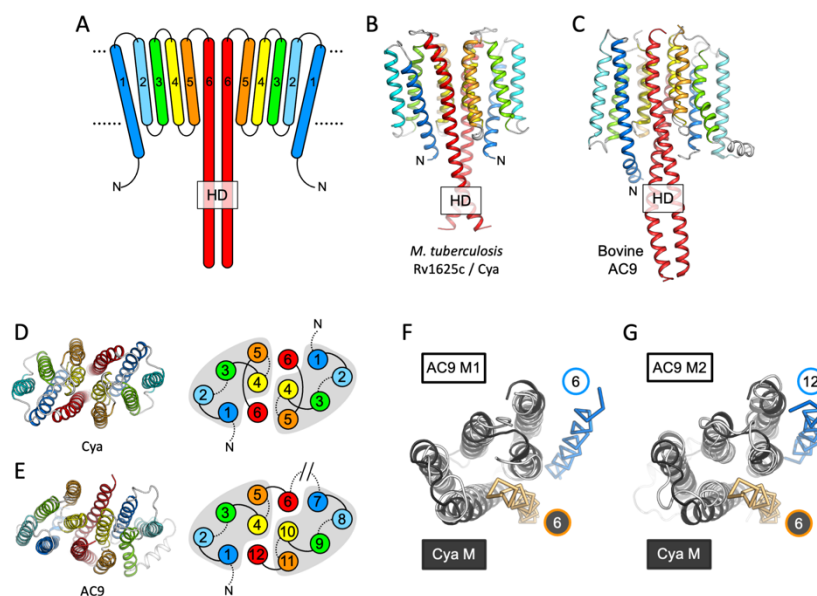

691

692

693 **Fig. 2. Features of the Cya TM domain.** (A) A schematic representation of the 6-TM bundles  
694 (TM1-TM6) of Cya, arranged as dimer. (B-C) A view of Cya (B) and AC9 (C) TM domain parallel  
695 to the membrane plane. (D-E) A view of Cya (D) and AC9 (E) TM domain perpendicular to the  
696 membrane plane. The schematic indicates the relative arrangement of the TM helices, with helices  
697 4, 5 and 6 at the dimer interface. The grey shapes indicate the conserved structural motif (TM1-5  
698 in Cya, TM1-5 and TM7-11 in AC9) of the membrane ACs. The extracellular and intracellular  
699 loops connecting the TM helices are shown using solid and dotted lines, respectively. The  
700 connection between TM6 and TM7 of AC9 is indicated as a broken line, in place of the catalytic  
701 domain C1a and the connecting loop C1b. (F-G) Alignment of the 6-TM bundles of Cya (black)  
702 and AC9 (white) reveals a high level of structural conservation, in particular in the TM1-5 (RMSD  
703 3.42 Å over 112 residues; F) and TM7-11 regions of the two proteins (RMSD 3.56 over 112  
704 residues; G). The positions of the HD-forming TM helices are conserved, but the TM6 and TM12  
705 are swapped in AC9 (blue) relative to Cya (orange).

706

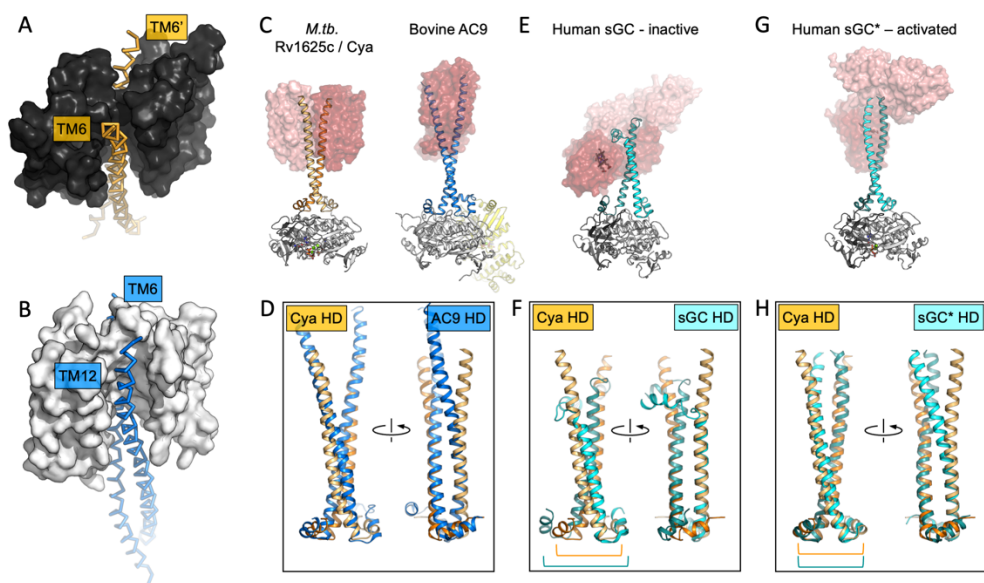

707

708

709

710

711

712

713

714

715

716

717

718

719

**Fig. 3. The role of the TM domain as a chaperone for HD / AC assembly.** (A-B) Guide rail-like structures are formed by the TM1-5 in Cya (black, A) and the TM1-5/TM7-11 in AC9 (white, B). The arrangement of these rail-like structures positions the TM6 helices for optimal assembly of the helical (HD) and the catalytic domain. (C) The views of Cya and AC9 with the TM1-5 (Cya) and TM1-5/TM7-11 (AC9; PDB ID: 6r3q) represented as transparent surface. (D) The TM-HD regions of Cya and AC9 aligned. Despite the difference in HD length and the deviation in the TM domains, the cores of the HD domains are well aligned. (E-F) Similar to C-D, for the human soluble guanylyl cyclase sGC (inactive form; PDB ID: 6jt0). (G-H) Similar to E-F, for the activated form of sGC (sGC\*; PDB ID: 6jt2). The brackets in F and H indicate the misaligned (F) and aligned (H) portions of the Cya and sGC HDs.

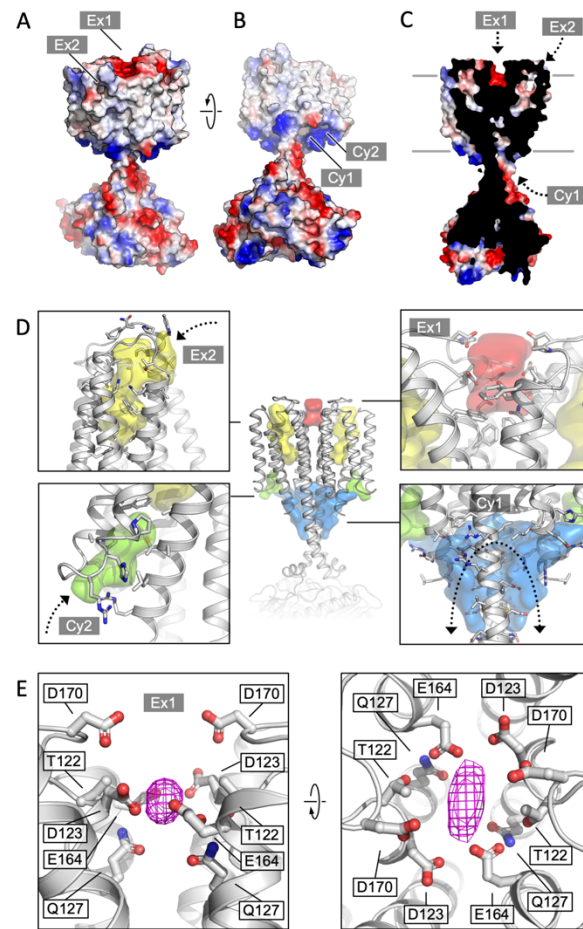

720

721

722

723

724

725

726

727

728

729

730

731

732

**Fig. 4. Cya TM domain as a receptor module.** (A) A view of the Cya structure (nanobody NB4 not shown) in surface representation, coloured according to electrostatic potential. The location of two putative binding sites, sites Ex1 (negatively charge) and Ex2 (hydrophobic) are indicated. (B) Similar as (A), a view at the Cya structure from the cytosol, showing the locations of the positively charged sites Cy1 and Cy2. (C) A slice through the structure shows the internal cavities with access points Ex1, Ex2 and Cy1. (D) The density maps corresponding to the internal cavities within the TM region of Cya, calculated using 3V (56) and low pass-filtered to 3 Å for presentation purposes. Arrows indicate the access to the cavities. (E) A prominent density featured in the density map of Cya-NB4 complex, occupying the site Ex1. Polar and negatively charged residues surround the density, consistent with a binding site for metals (or organic cations).

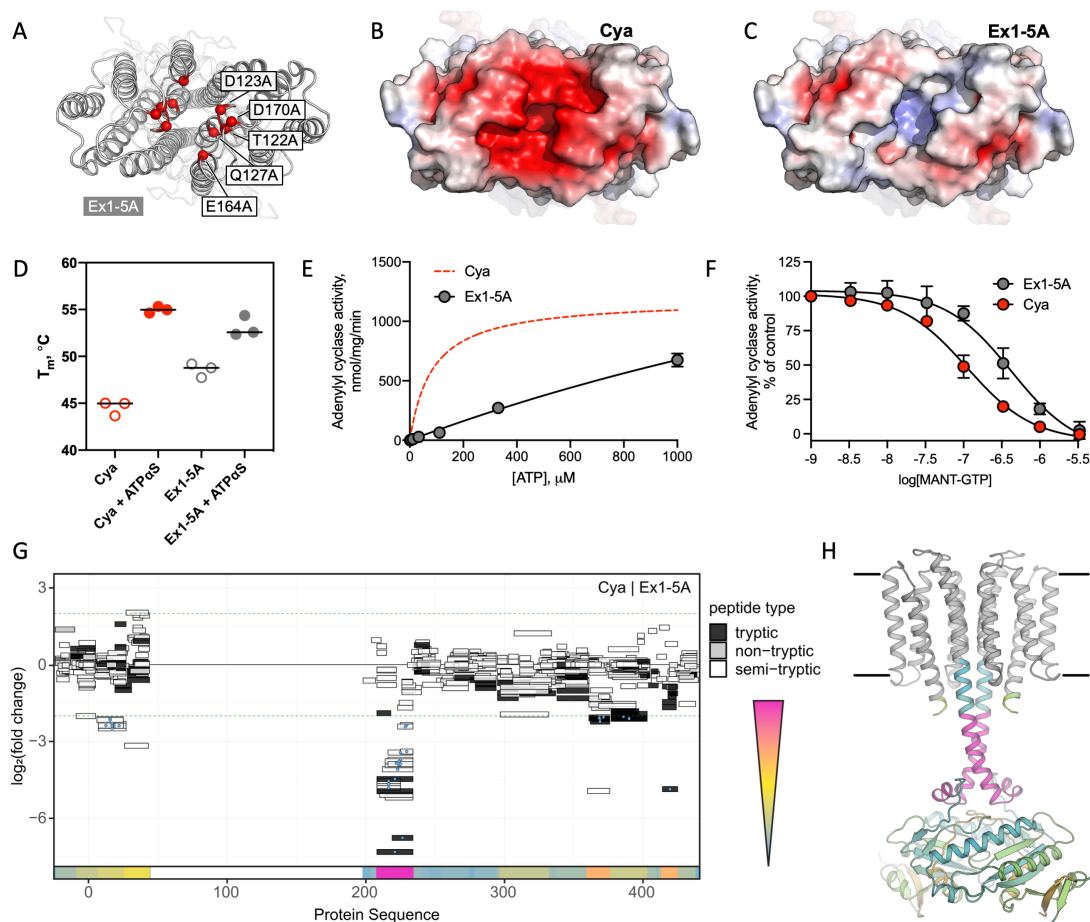

733

734

735

736

737

738

739

740

741

742

743

744

745

746

747

748

749

750

751

**Fig. 5. Extracellular site Ex1 is linked to the adenylyl cyclase activity of Cya.** (A) An illustration of the Ex1 site residues mutated to generate the Ex1-5A mutant, substituting the five indicated residues with Ala. (B) Calculated electrostatic potential of the wild-type Cya. (C) Same as B, for the Ex1-5A mutant. (D) The mutant shows thermostability profile consistent with that of the wild-type protein, based on the observed  $T_m$  values in the presence and in the absence of a nucleotide analogue. For experiments in D-F,  $n = 3$ ; data are shown as mean  $\pm$  S.E.M. (E) The enzymatic properties of the mutant are substantially affected by the mutation (the dashed red curve corresponds to the fit shown for Cya in Fig. 1D for comparison). (F) The affinity of the Ex1-5A mutant for MANT-GTP is reduced (110 and 420  $\mu\text{M}$ , respectively). (G) Limited proteolysis-coupled mass spectrometry (LiP-MS) analysis of Cya and Ex1-5A mutant. The graph indicates sequence coverage and the identified tryptic, semi-tryptic or non-tryptic peptides. Significantly changing peptides ( $|\log_2(\text{FC})| > 2$ ;  $q\text{-value} < 0.001$ ) are marked with a blue dot. A bar within the plot is coloured according to the change in protease accessibility at each peptide (blue = no change, pink = high fold change; absolute  $\log_2$  transformed fold changes range from 0 to 7.3). (H) A model of Cya coloured according to the bar in (E).

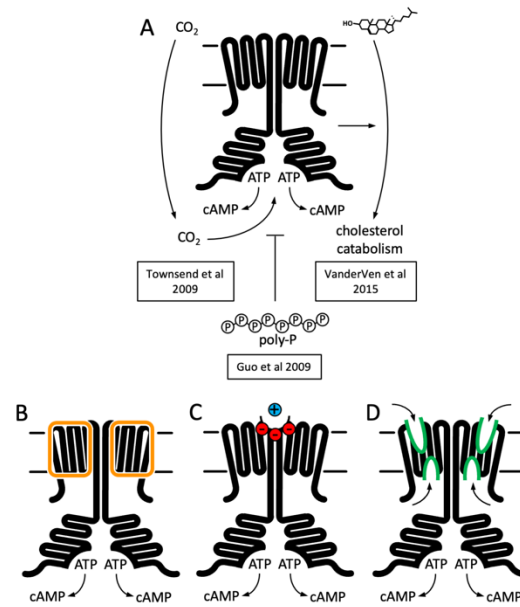

752  
753

754 **Fig. 6. Function and structure of Rv1625c / Cya.** (A) Known regulators and cellular functions  
755 of Cya. (B-D) Insights into the function of the membrane domain of Cya, with new functions of  
756 the TM domain suggested by the cryo-EM structure: a stabilizer of the cytosolic domain assembly  
757 (B), a receptor for positively charged agents via the Ex1 site at the Cya dimer interface (C), a  
758 receptor of yet unknown ligands via sites Ex2 / Cy1 / Cy2 (D).
