# **Title: Structure of *Mycobacterium tuberculosis* Cya, an evolutionary ancestor of the mammalian membrane adenylyl cyclases**

**Authors:** Ved Mehta<sup>1</sup>, Basavraj Khanppnavar<sup>1,2</sup>, Dina Schuster<sup>1,2,4</sup>, Irene Vercellino<sup>1</sup>, Angela Kosturanova<sup>1</sup>, Tarun Iype<sup>1</sup>, Sasa Stefanic<sup>3</sup>, Paola Picotti<sup>4</sup> and Volodymyr M. Korkhov<sup>1,2\*</sup>

## **Affiliations:**

<sup>1</sup> Laboratory of Biomolecular Research, Division of Biology and Chemistry, Paul Scherrer Institute, Villigen, Switzerland

<sup>2</sup> Institute of Molecular Biology and Biophysics, ETH Zurich, Switzerland

<sup>3</sup> Institute of Parasitology, University of Zurich, Switzerland

<sup>4</sup> Institute of Molecular Systems Biology, ETH Zurich, Switzerland

\*Corresponding author. E-mail: volodymyr.korkhov@psi.ch

**Abstract:** *Mycobacterium tuberculosis* adenylyl cyclase (AC) Cya is an evolutionary ancestor of the mammalian membrane ACs and a model system for studies of their structure and function. Although the vital role of ACs in cellular signaling is well established, the function of their transmembrane (TM) regions remains unknown. Here we describe the cryo-EM structure of Cya bound to a stabilizing nanobody at 3.6 Å resolution. The TM helices 1-5 form a structurally conserved domain that facilitates the assembly of the helical and catalytic domains. The TM region contains discrete pockets accessible from the extracellular and cytosolic side of the membrane. Neutralization of the negatively charged extracellular pocket Ex1 destabilizes the cytosolic helical domain and reduces the catalytic activity of the enzyme. The TM domain acts as a functional component of Cya, guiding the assembly of the catalytic domain and providing the means for direct regulation of catalytic activity in response to extracellular ligands.

**One-Sentence Summary:** Cryo-EM structure of *M. tuberculosis* adenylyl cyclase Cya provides clues to the role of its transmembrane domain

## Introduction

Adenylyl cyclases (ACs) convert molecules of ATP into 3,5-cyclic AMP (cAMP), a universal second messenger and a master regulator of cellular homeostasis (1). In mammalian cells, the membrane-associated ACs (Fig. 1A) generate cAMP upon activation of the cell surface receptors, GPCR, via G protein subunits (2), or in some cases by  $\text{Ca}^{2+}$ /calmodulin (3). The cAMP molecules produced by the ACs bind to a number of effector proteins, including protein kinase A (4), cyclic nucleotide-gated channel channels (5), EPAC (6), popeye proteins (7) among others, which in turn regulate virtually all aspects of cellular physiology (8). The nine mammalian membrane ACs (AC1-9) share the topology and domain organization: twelve transmembrane (TM) helices with TM6 and TM12 extending to form a coiled coil of the helical domain (HD), linking the TM bundle to the bipartite catalytic domain (Fig. 1A) (9). Recently we determined the cryo-EM structure of the full-length AC, the bovine AC9 bound to G protein as subunit, revealing the organization of the membrane-integral region of a membrane AC (9). Although the structure provided important insights into the mechanism of AC9 auto-regulation, the role of the elaborate twelve-helical membrane domain remains unexplained.

A putative evolutionary ancestor of the mammalian membrane ACs has been identified in the genome of *Mycobacterium tuberculosis*: Rv1625c, or Cya (10). This protein is one of the sixteen ACs present in genome of *M. tuberculosis*, and one of five ACs predicted to be polytopic membrane proteins (11). The exact function of Cya is not clear, although available evidence indicates that the protein may be involved in  $\text{CO}_2$  sensing (12) and cholesterol utilization by *M. tuberculosis* (13, 14). Cholesterol utilization during infection by *M. tuberculosis* is linked to its pathogenesis (15), indicating a potential role of Cya at some stages of macrophage infection. The catalytic domain of Cya belongs to the same fold as those of the mammalian ACs, the class III AC / guanylyl cyclase (GC). Unlike the mammalian ACs, Cya is predicted to include only six TM helices, with TM6 extending into a HD connected to the catalytic domain (Fig. 1B-C). The protein has to dimerize to form a functional unit that has been previously presumed to resemble the pseudo-heterodimeric fold of the full-length mammalian ACs (16, 17).

The role of the membrane domain in membrane ACs is a mystery. Polytopic membrane nucleotidyl cyclases with membrane domains of known function have been described in several organisms. The ACs in *Paramecium*, *Plasmodium* and *Tetrahymena* are fused to an ion channel module (18), and the light-sensitive GCs in several fungi, such as *Blastocladiella emersonii*, which are fused to a rhodopsin-like membrane module that binds a light-sensitive retinal chromophore (19). However, the functional role of the TM regions in the mammalian membrane ACs remains unclear. A recent structure of the bovine AC9 shed relatively little light on the possible function of the membrane domain (9), but provided a description of the unique TM helix arrangement in the membrane anchor of the protein. Interestingly, experiments with domain-substituted Cya, a presumptive evolutionary ancestor of the mammalian ACs, have suggested that its membrane region may have a regulatory role, potentially acting as a receptor for yet unidentified ligands (20).

Understanding the structure and function of the AC membrane domains, conserved through evolution from bacteria to mammals, is essential for understanding the regulation of cAMP generation by the cells at rest and during AC activation. The importance and necessity of a complex polytopic membrane domain in the membrane ACs is one of the key open questions in the cAMP signaling field. To address this key question, we set out to determine the structure of the model membrane AC, *M. tuberculosis* Cya.

## Results

**Characterization of the full-length Cya.** The full-length *M. tuberculosis* Cya (Fig. 1C) was expressed in *Escherichia coli* and purified in digitonin micelles using affinity chromatography followed by size exclusion chromatography (Fig. S1). Adenylyl cyclase activity assays confirmed that the full-length protein was purified in a functional form (Fig. 1D;  $K_m$  for Cya was  $\sim 80 \mu M$ ). The “SOL” construct, consisting of the catalytic cytosolic domain (residues 203-428) showed low activity (Fig. 1D), indicating the importance of the membrane-spanning region for proper assembly and activity of the cyclase, in agreement with the previous reports (17, 21).

**Nanobody NB4 facilitates Cya structure determination.** Cya is a relatively small membrane protein (45 kDa for a monomer). The presence of a helical domain linking the TM domain with the catalytic domain of Cya makes this protein a challenging target for structural studies. To increase the likelihood of high resolution structure determination, we used the purified Cya to generate a panel of nanobodies, camelid antibody fragments (22), recognizing the target protein with high affinity. One of these reagents, nanobody 4 (NB4), had no effect on the catalytic activity of the full-length cyclase (Fig. 1D), but had a nanomolar affinity for the SOL domain (Fig. S1E). We reconstituted a complex of the detergent-purified full-length Cya and NB4 (mixed at a molar ratio of 1:1.5), in the presence of 0.5 mM MANT-GTP, a non-cyclizable nucleotide analogue, and 5 mM  $MnCl_2$ . The sample was subjected to cryo-EM imaging and single particle analysis (Fig S2), yielding a 3D reconstruction of the protein in C1 symmetry at 3.8 Å resolution (Fig. S2-3, Table S1).

The reconstruction revealed the full-length Cya arranged as a dimer bound to three copies of NB4 nanobody: two copies bound symmetrically to the SOL portions of the Cya dimer, and one asymmetrically bound to the extracellular surface of the protein (Fig. S3). To visualize the details of the Cya-NB4 interaction, we crystallized the SOL construct in the presence of NB4 and solved the X-ray structure of the complex at 2.1 Å resolution (Fig. S4A, Table S2). The structure showed an extensive interaction interface between the negatively charged surface of the monomeric SOL domain and the NB4 (Fig. S4B). Interestingly, the crystallized construct did not form a native-like dimeric form of the enzyme, but nevertheless retained the ability to bind to MANT-GTP/ $Mn^{2+}$ , with an unusual twist of the MANT-GTP base (Fig. S4C). The well-resolved structure of the Cya SOL-NB4 complex allowed us to reliably place NB4 into the cryo-EM density map (Fig. S3-4).

To improve the resolution of the cryo-EM density map in the regions of highest interest, we masked out the extracellular NB4 density and refined the Cya-NB4 dataset imposing the C2 symmetry. This resulted in a 3D reconstruction at 3.57 Å resolution, which allowed us to reliably trace the polypeptide chain in the cryo-EM density map, covering residues 41-428 of the full-length Cya construct (Fig. 1E-F, Fig. S3, Table S1).

**Key features of the Cya structure.** Our 3D reconstruction revealed the previously unresolved portion of the protein, the 6-TM bundle, arranged into a homodimer (Fig. 1F, 2B, 2D). The SOL portion of the protein, linked to the TM region via the helical domain (HD), adopted a conformation consistent with our previous structure of the SOL domain of *M. intracellulare* Cya homologue (Fig. S4) (17). The two nucleotide binding sites of Cya are occupied with the molecules of MANT-GTP/ $Mn^{2+}$ , which we modelled based on the previous structures and the X-ray structure of SOL-NB4 complex (Fig. S4). The C1 and the C2 maps provide no evidence of asymmetry in the active site, which we have observed in the structure of *M. intracellulare* Cya (17). Therefore, the two MANT-GTP molecules were modelled in identical orientations.

The HD region is believed to be a critical element in the membrane and soluble ACs and GCs, as this region couples the N-terminal regulatory domains to the catalytic function of these proteins (23-25). In Cya, the HD extends from the TM6 (Fig. 2A-B), forming a coiled-coil observed in the structures of homologous proteins, including AC9 (Fig. 2C) (9) and sGC (23) (Fig. 3). Interestingly, the size difference between the HD helix in Cya and the HD1 and HD2 helices in AC9 leads to an ~90 rotation of the corresponding TM regions, relative to the catalytic domains (Fig. S5A). This may be an indication that the exact structural alignment of the TM domain and the relatively remote catalytic domain may not be a conserved feature of the membrane ACs. Instead, it is likely that the precise TM-HD and HD-catalytic domain coupling plays the key role in the formation and regulation of the catalytic center in the membrane AC, consistent with the function of the HD as a transducer element in the AC structure (26).

The resolved portion of the Cya N-terminus (residues V<sub>41</sub>ARRQR<sub>46</sub>), rich in positively charged residues, is immediately adjacent to the HD region. The early work on Cya identified the mutations in this region that disrupt the function of the protein (17), suggesting that the intact residues in the N-terminus stabilize the HD. Our structure provides the structural basis for understanding the likely disruptive effects of these mutations. The positively charged residues R43-R44 likely stabilize the negatively charged surface of the HD (Fig. S5B).

**The TM1-5 bundle as a rail for the HD helices.** The TM helices 4, 5 and 6 of Cya form an extensive dimer interface within the membrane (Fig. 2D). The dimer interface residues, close to the “core” of the protein, are relatively well conserved among the Cya homologues from Mycobacteria (Fig. S7), with relatively poorly conserved residues in TM1-3. A comparison of the 6-TM bundle of Cya with the corresponding regions in the bovine AC9 (TM1-6 and TM7-12) shows that the helices TM1-5 (and TM7-11 for the AC9) form a well defined structural motif (Fig. 2D-E). A striking difference between the Cya and AC9 membrane domains is that the TM region that forms the HD helix is swapped in AC9: the TM12 of AC9 occupies the same position as the TM6 of Cya. Similarly, TM6 in AC9 is placed in a corresponding position relative to the TM7-11 (Fig. 2F-G). The TM1-5 bundle in Cya appears to act as a “guide rail” for the TM6/HD helix of Cya, guiding the correct assembly of the HD coiled coil and the catalytic domain of the cyclase (Fig. 3A). This feature is remarkably similar in AC9, with TM1-5 and TM7-11 arranged in a near-identical way (Fig. 3B), and with a closely matching HD core (Fig. 3D).

The previous experiments in *M. intracellulare* Cya have shown that the HD and the TM regions of the protein are critically important for the protein’s dimerization and functional assembly (17). The lack of the TM region results in failure to form a stable active dimer of *M. tuberculosis* Rv1625c / Cya, even in the presence of a nucleotide analogue MANT-GTP (Fig. S5). The importance of the TM domain as a factor that promotes correct protein folding is further illustrated by the ability of the isolated Cya SOL construct to form a misfolded, domain-swapped assembly (27). It is thus tempting to suggest that the key function of the TM domain in a membrane AC is to guides the assembly of the enzyme in a catalytically competent form.

This may have important implications for AC regulation. In a related enzyme, the NO-sensing sGC, the heme-containing NO-receptor domain is fused to the HD region in place of the TM regions seen in Cya or in the mammalian AC9 (Fig. 3E-G). In its inactive form, the sGC displays a conformation where HD helices are bent, with an accompanying substantial unwinding of the helical domain core (Fig. 3E). Comparison of the Cya HD core with that of the sGC HD core highlights this discrepancy (Fig. 3F). In contrast, activation of sGC is accompanied with a large-scale conformational change, “straightening” the HD (Fig. 3H) and adopting the HD conformation that closely matches that of Cya (Fig. 3H). The position of the

“kink” in the HD of sGC approximately corresponds to the membrane-cytosol interface in Cya. Thus, the very distant yet related proteins sGC and Cya (as well as AC9 and other membrane ACs) may be subject to very similar modes of regulation involving changes in the HD, which may result in changes in the catalytic domain of the protein. While in sGC the process is guided by the heme-containing receptor domain, in the membrane ACs this function is likely performed by the TM domain.

**The TM domain of Cya as a putative receptor module.** The structure of Cya revealed several prominent cavities in the TM domain of the protein, which may serve a stabilizing or regulatory role (Fig. 4). A negatively charged cleft (site Ex1) is formed at the extracellular interface of the two 6-TM bundles (Fig. 4A, D, E). The negative charge of this pocket is provided by the residues D123, E164 and D170 of each monomer, facing into the cavity (Fig. 4E). This region may be involved in binding of positively charged ions, small molecules, lipids or peptides. The ability of NB4 nanobody to interact with this pocket spuriously indicates that it may also be a site of interaction with a yet unknown natural protein partner.

Additionally, a prominent pocket open to the extracellular side of the protein is formed within each TM bundle (site Ex2; Fig. 4A, C-D). This pocket may accommodate small molecules or lipids, with a possible access route from the outer leaflet of the lipid bilayer surrounding Cya. A similar internal pocket is present in the TM1-6 bundle in AC9 (Fig. S8). Deep pockets on the cytosolic side of the Cya TM region are formed between the HD domain and the N-terminus/TM1 (site Cy1), as well as between TM1-3 (site Cy2; Fig. 4B-D). The entrances into these pockets are lined by positively charged residues R43, R44, R46 of the N-terminus, as well as R203 and R207 in the HD domain from the adjacent monomer (Fig. 4B-D). The positive charge of this region indicates a potential role in interactions with the phospholipid headgroups or positively charged peptides or small molecules. The interpretation of these cytosolic intramembrane pockets requires caution, as the residues 1-40 of Cya are not resolved in our 3D reconstruction but may interact with and occlude these pockets. Analysis of the sites Ex2-Cy2 shows that they are discontinuous, precluding formation of a channel traversing the entire width of the membrane (Fig. 4D). Our MD simulations confirmed the ability of water molecules to enter into the Ex2 and Cy2 site, but no transmembrane water transport could be observed (Fig. S7F). Thus, while the pockets Ex2 and Cy2 provide support to the hypothesis of the AC TM domain as a receptor, any translocation events would have to involve substantial conformational rearrangements opening the connection between the two sites.

Our density map features a small but prominent density in the site Ex1 (Fig. 4E), which presently can not be assigned to a specific entity, but which could correspond to a bound metal ( $\text{Na}^+$ ,  $\text{Mg}^{2+}$ ,  $\text{Mn}^{2+}$  or a yet unknown component co-purified with the protein from *E. coli*). It is conceivable that disruption of this negatively charged interface may lead to the loss of the rail structure of the TM region, with concomitant changes in the HD helix arrangement and ultimately the catalytic domain of Cya. To test the behavior of this site, we performed molecular dynamics (MD) simulations (Fig. S7). The site Ex1 behaved as a genuine metal binding site, occupied by the  $\text{K}^+$  and  $\text{Mg}^{2+}$  ions similarly to the metal binding site in the Cya catalytic center over the course of the simulation (Fig. S7B-E). Thus, the evidence obtained experimentally and using MD simulations strongly supports a function of the extracellular surface of Cya as a receptor for positively charged ligands.

**The Ex1 site controls the helical and catalytic domain.** To test the role of the Ex1 site experimentally, we mutated the polar residues lining this site (T122, D123, Q127, E164 and D170) to Ala (Fig. 5A-C). The resulting construct (referred to as Ex1-5A, Fig. 5A, C) was successfully expressed and purified in digitonin (Fig. S11). The biochemical properties and stability of the Ex1-5A mutant in the absence or in the presence of a nucleotide were similar to



those of the wild-type Cya (Fig 5D, Fig. S9). In contrast, the enzymatic activity of Ex1-5A was substantially reduced (Fig. 5E), with a 4-fold reduction in apparent affinity for a nucleotide inhibitor, MANT-GTP (judged by the MANT-GTP IC<sub>50</sub> values, Fig. 5F).

To investigate the effects of the Ex1-5A mutant on Cya structure, we performed limited proteolysis–coupled mass spectrometry (LiP-MS) experiments on both the wild-type and the mutant in the absence of added nucleotides, and compared the peptides obtained by pulse proteolysis with proteinase K (PK) (Fig. 5G). Comparative analysis of the LiP-MS profile of the wild-type Cya and the Ex1-5A mutant revealed a significant increase in protease accessibility of the HD in the mutant (Fig. 5G-H). Thus, modification of the extracellular site Ex1 of Cya leads to changes in the dynamics of its cytosolic HD, accompanied by a dramatic reduction in enzymatic activity.

## Discussion

The cryo-EM structure of *M. tuberculosis* Cya provides a unique insight into the assembly and regulation of a model membrane AC. To this day, the functional role of the TM region in the polytopic membrane AC, such as Cya or the mammalian AC1-9, remains elusive. Why does a cell need an AC with such an elaborate membrane anchor? A lipid anchor or a single TM helix would be sufficient to target the catalytic domain to the membrane compartment where cAMP production is required. Our structure provides two possible reasons for the ACs to have such a TM domain: (i) to facilitate the assembly of the HD domain, (ii) to act as a receptor module, binding ligands at several newly identified putative ligand binding sites, including the pockets within the Cya monomers and at the Cya-Cya interface (Fig. 6). The two functions are not mutually exclusive, as the ligand interactions with the membrane region of the AC may influence the HD assembly and thus regulate the cyclase function.

The presence of potential ligand binding pockets at the extracellular surface of Cya lends strong support to the long-standing idea that the TM domains of the ACs may act as receptor modules for yet unknown ligands (20). The possibility of direct regulation of cAMP production via the membrane anchors of the ACs would have long-reaching consequences: a vast repertoire of pharmacological agents on the market today act via GPCRs coupled to membrane ACs (28). Direct modulation of the cAMP production through the AC membrane domains could revolutionize the approaches to drug development for a wide range of diseases where the GPCRs are currently the primary drug targets. A related notion of importance for molecular pharmacology and medicinal chemistry is the potential interactions between the already existing drugs and the membrane domains of the ACs. Such interactions may lead to unwanted side-effects associated with cAMP signaling, such as emesis and changes in heart rate and contractility (29). An example of this is the antifungal drug miconazole, which is known to have cardiotoxic effects (30, 31). Miconazole has recently been shown to directly activate AC9, likely via its TM domain (32). The interaction with AC9 may contribute to the cardiorespiratory side-effects of this drug. Similar interactions involving other drug / AC combinations may have to be systematically evaluated, especially in the cases where changes in cAMP levels or in the downstream signaling events are recognized as side-effects.

In the absence of known interaction partners for the membrane regions of the ACs it is difficult to predict the effect of ligand binding to any of the pockets we find in the Cya structure. Nevertheless, the structure hints at ways that could be exploited by various agents to affect the AC activity via the membrane domain. The closest example of cyclase modulation through the receptor-mediated effect on the HD helices is the case of soluble GC, described at atomic resolution, has been detailed above (Fig. 3) (23). The presence of disease-linked mutations in

the HD regions of AC5 (33, 34) and retGC1 (35, 36) underscore the importance of this domain for cyclase structure and function. It is clear that the HD region plays a vital part in AC and GC assembly and stability. This is evident from our experiments with the *M. intracellulare* Cya (17), as well as the results of others using Rv1625c and mammalian ACs as model enzymes (37). It remains to be determined whether any agents can elicit conformational changes in the membrane domain of Cya (or in any of the mammalian membrane ACs), leading to substantial changes in the HD similar in scale to the changes observed in the sGC during its activation. Our MD simulations and the experiments with the Ex1-5A mutant of Cya are suggestive of a receptor-transducer-catalyst relay, where the extracellular portion of the TM region acts as a “receptor” for a yet unknown ligand, the HD transduces the activation, and the catalytic domain catalyses ATP to cAMP conversion. This notion is further supported by previous work on Cya that identified the HD region as a transducer of a putative signal (20, 26). The structure of Cya can serve as a starting point for exploration of the TM domain-mediated regulation of membrane ACs.

## References and Notes

1. J. U. Linder, Class III adenylyl cyclases: Molecular mechanisms of catalysis and regulation. *Cellular and Molecular Life Sciences* **63**, 1736-1751 (2006).
- 5 2. P. Sassone-corsi *et al.*, The Cyclic AMP Pathway. 2012-2015 (2012).
3. M. L. Halls, D. M. F. Cooper, Regulation by Ca<sup>2+</sup>-Signaling Pathway of Adenylyl Cyclases. (2011).
4. M. L. Halls, D. M. F. Cooper, Adenylyl cyclase signalling complexes – Pharmacological challenges and opportunities. *Pharmacology and Therapeutics* **172**, 171-180 (2017).
- 10 5. U. B. Kaupp, R. Seifert, Cyclic nucleotide-gated ion channels. *Physiol Rev* **82**, 769-824 (2002).
6. J. de Rooij *et al.*, Epac is a Rap1 guanine-nucleotide-exchange factor directly activated by cyclic AMP. *Nature* **396**, 474-477 (1998).
- 15 7. R. F. Schindler, T. Brand, The Popeye domain containing protein family--A novel class of cAMP effectors with important functions in multiple tissues. *Prog Biophys Mol Biol* **120**, 28-36 (2016).
8. K. Yan, L. N. Gao, Y. L. Cui, Y. Zhang, X. Zhou, The cyclic AMP signaling pathway: Exploring targets for successful drug discovery (review). *Molecular Medicine Reports* **13**, 3715-3723 (2016).
- 20 9. C. Qi, S. Sorrentino, O. Medalia, V. M. Korkhov, The structure of a membrane adenylyl cyclase bound to an activated stimulatory G protein. *Science* **364**, 389-394 (2019).
10. G. Ying Lan, T. Seebacher, U. Kurz, J. U. Linder, J. E. Schultz, Adenylyl cyclase Rv1625c of Mycobacterium tuberculosis: A progenitor of mammalian adenylyl cyclases. *EMBO Journal* **20**, 3667-3675 (2001).
- 25 11. G. Bai, G. S. Knapp, K. A. McDonough, Cyclic AMP signalling in mycobacteria: Redirecting the conversation with a common currency. *Cellular Microbiology* **13**, 349-358 (2011).
12. P. D. Townsend *et al.*, Stimulation of mammalian G-protein-responsive adenylyl cyclases by carbon dioxide. *Journal of Biological Chemistry* **284**, 784-791 (2009).
13. R. M. Johnson *et al.*, Chemical activation of adenylyl cyclase Rv1625c inhibits growth of Mycobacterium tuberculosis on cholesterol and modulates intramacrophage signaling. *Molecular Microbiology* **105**, 294-308 (2017).
- 35 14. B. C. VanderVen *et al.*, Novel Inhibitors of Cholesterol Degradation in Mycobacterium tuberculosis Reveal How the Bacterium's Metabolism Is Constrained by the Intracellular Environment. *PLoS Pathogens* **11**, 1-20 (2015).
15. K. M. Wilburn, R. A. Fieweger, B. C. VanderVen, Cholesterol and fatty acids grease the wheels of Mycobacterium tuberculosis pathogenesis. *Pathog Dis* **76**, (2018).
- 40 16. A. D. Ketkar, A. R. Shenoy, U. A. Ramagopal, S. S. Visweswariah, K. Suguna, A structural basis for the role of nucleotide specifying residues in regulating the oligomerization of the Rv1625c adenylyl cyclase from M. tuberculosis. *Journal of Molecular Biology* **356**, 904-916 (2006).
17. I. Vercellino *et al.*, Role of the nucleotidyl cyclase helical domain in catalytically active dimer formation. *Proceedings of the National Academy of Sciences*, 201712621-201712621 (2017).
- 45 18. J. H. Weber *et al.*, Adenylyl cyclases from Plasmodium, Paramecium and Tetrahymena are novel ion channel/enzyme fusion proteins. *Cell Signal* **16**, 115-125 (2004).



19. G. M. Avelar *et al.*, A rhodopsin-guanylyl cyclase gene fusion functions in visual perception in a fungus. *Curr Biol* **24**, 1234-1240 (2014).
20. S. Beltz, J. Bassler, J. E. Schultz, Regulation by the quorum sensor from *Vibrio* indicates a receptor function for the membrane anchors of adenylyl cyclases. *eLife* **5**, 1-17 (2016).
21. Q. Ding, R. Gros, J. Chorazyczewski, S. S. G. Ferguson, R. D. Feldman, Isoform-Specific Regulation of Adenylyl Cyclase Function by Disruption of Membrane Trafficking. *Molecular Pharmacology* **67**, 564-571 (2005).
22. E. R. Geertsma, R. Dutzler, A versatile and efficient high-throughput cloning tool for structural biology. *Biochemistry* **50**, 3272-3278 (2011).
23. Y. Kang, R. Liu, J. X. Wu, L. Chen, Structural insights into the mechanism of human soluble guanylate cyclase. *Nature* **574**, 206-210 (2019).
24. U. Scheib *et al.*, Rhodopsin-cyclases for photocontrol of cGMP/cAMP and 2.3 Å structure of the adenylyl cyclase domain. *Nat Commun* **9**, 2046 (2018).
25. M. Ohki *et al.*, Molecular mechanism of photoactivation of a light-regulated adenylyl cyclase. *Proc Natl Acad Sci U S A* **114**, 8562-8567 (2017).
26. M. Ziegler *et al.*, Characterization of a novel signal transducer element intrinsic to class IIIa/b adenylyl cyclases and guanylate cyclases. *FEBS J* **284**, 1204-1217 (2017).
27. D. Barathy, R. Mattoo, S. Visweswariah, K. Suguna, New structural forms of a mycobacterial adenylyl cyclase Rv1625c. *IUCrJ* **1**, 338-348 (2014).
28. K. Sriram, P. A. Insel, G Protein-Coupled Receptors as Targets for Approved Drugs: How Many Targets and How Many Drugs? *Mol Pharmacol* **93**, 251-258 (2018).
29. E. Parnell, T. M. Palmer, S. J. Yarwood, The future of EPAC-targeted therapies: agonism versus antagonism. *Trends Pharmacol Sci* **36**, 203-214 (2015).
30. V. Fainstein, G. P. Bodey, Cardiorespiratory toxicity due to miconazole. *Ann Intern Med* **93**, 432-433 (1980).
31. K. J. Won *et al.*, Antifungal miconazole induces cardiotoxicity via inhibition of APE/Ref-1-related pathway in rat neonatal cardiomyocytes. *Toxicol Sci* **126**, 298-305 (2012).
32. J. Simpson, A. Palvolgyi, F. A. Antoni, Direct stimulation of adenylyl cyclase 9 by the fungicide imidazole miconazole. *Naunyn Schmiedebergs Arch Pharmacol* **392**, 497-504 (2019).
33. Y. Z. Chen *et al.*, Autosomal dominant familial dyskinesia and facial myokymia: single exome sequencing identifies a mutation in adenylyl cyclase 5. *Arch Neurol* **69**, 630-635 (2012).
34. M. Carecchio *et al.*, ADCY5-related movement disorders: Frequency, disease course and phenotypic variability in a cohort of paediatric patients. *Parkinsonism Relat Disord* **41**, 37-43 (2017).
35. C. L. Tucker *et al.*, Functional analyses of mutant recessive GUCY2D alleles identified in Leber congenital amaurosis patients: protein domain comparisons and dominant negative effects. *Mol Vis* **10**, 297-303 (2004).
36. X. Zhao *et al.*, A novel GUCY2D mutation in a Chinese family with dominant cone dystrophy. *Mol Vis* **19**, 1039-1046 (2013).
37. Y. L. Guo, T. Seebacher, U. Kurz, J. U. Linder, J. E. Schultz, Adenylyl cyclase Rv1625c of *Mycobacterium tuberculosis*: a progenitor of mammalian adenylyl cyclases. *EMBO J* **20**, 3667-3675 (2001).
38. C. A. Brautigam, H. Zhao, C. Vargas, S. Keller, P. Schuck, Integration and global analysis of isothermal titration calorimetry data for studying macromolecular interactions. *Nat Protoc* **11**, 882-894 (2016).

39. A. O. Magnusson *et al.*, nanoDSF as screening tool for enzyme libraries and biotechnology development. *FEBS J* **286**, 184-204 (2019).
40. J. Zivanov *et al.*, New tools for automated high-resolution cryo-EM structure determination in RELION-3. *Elife* **7**, (2018).
- 5 41. S. Q. Zheng *et al.*, MotionCor2: anisotropic correction of beam-induced motion for improved cryo-electron microscopy. *Nat Methods* **14**, 331-332 (2017).
42. K. Zhang, Gctf: Real-time CTF determination and correction. *J Struct Biol* **193**, 1-12 (2016).
43. P. Emsley, K. Cowtan, Coot: model-building tools for molecular graphics. *Acta Crystallogr D Biol Crystallogr* **60**, 2126-2132 (2004).
- 10 44. P. D. Adams *et al.*, PHENIX: a comprehensive Python-based system for macromolecular structure solution. *Acta Crystallogr D Biol Crystallogr* **66**, 213-221 (2010).
45. A. Amunts *et al.*, Structure of the yeast mitochondrial large ribosomal subunit. *Science* **343**, 1485-1489 (2014).
- 15 46. V. B. Chen *et al.*, MolProbity: all-atom structure validation for macromolecular crystallography. *Acta Crystallogr D Biol Crystallogr* **66**, 12-21 (2010).
47. W. Kabsch, Integration, scaling, space-group assignment and post-refinement. *Acta Crystallogr D Biol Crystallogr* **66**, 133-144 (2010).
- 20 48. A. G. W. Leslie, H. R. Powell. (Springer Netherlands, Dordrecht, 2007), pp. 41-51.
49. P. A. Karplus, K. Diederichs, Linking crystallographic model and data quality. *Science* **336**, 1030-1033 (2012).
50. C. Kutzner *et al.*, More bang for your buck: Improved use of GPU nodes for GROMACS 2018. *J Comput Chem* **40**, 2418-2431 (2019).
- 25 51. J. Yang *et al.*, The I-TASSER Suite: protein structure and function prediction. *Nat Methods* **12**, 7-8 (2015).
52. S. Jo, T. Kim, V. G. Iyer, W. Im, CHARMM-GUI: a web-based graphical user interface for CHARMM. *J Comput Chem* **29**, 1859-1865 (2008).
53. W. Humphrey, A. Dalke, K. Schulten, VMD: visual molecular dynamics. *J Mol Graph* **14**, 33-38, 27-38 (1996).
- 30 54. J. Quast, D. Schuster, protti: Bottom-Up Proteomics and LiP-MS Quality Control and Data Analysis Tools. R package version 0.2.0. <https://CRAN.R-project.org/package=protti>. (2021).
55. C. Ahlmann-Eltze, Differential Abundance Analysis of Label-Free Mass Spectrometry Data. R package version 1.4.0. (2020).
- 35 56. N. R. Voss, M. Gerstein, 3V: cavity, channel and cleft volume calculator and extractor. *Nucleic Acids Res* **38**, W555-562 (2010).
57. H. Ashkenazy *et al.*, ConSurf 2016: an improved methodology to estimate and visualize evolutionary conservation in macromolecules. *Nucleic Acids Res* **44**, W344-350 (2016).
- 40

**Acknowledgments:** We thank Emiliya Poghosyan and Elisabeth Müller-Gubler (EM Facility, PSI), and Miroslav Peterek (ScopeM, ETH Zurich) for their support in cryo-EM data collection. We also thank Spencer Bliven and Marc Caubet Serrabou (PSI) for support in high performance computing.

**Funding:**

Swiss National Science Foundation (150665; VMK)

Swiss National Science Foundation (176992; VMK)

Swiss National Science Foundation (184951; VMK)

Vontobel Stiftung (VMK)

**Author contributions:**

Conceptualization: VM, VMK

Methodology: VM, BK, DS, IV, SS, PP, VMK

Investigation: VM, BK, AK, DS, TI, IV, VMK

Visualization: VM, BK, DS, VMK

Funding acquisition: VMK

Project administration: VMK

Supervision: PP, VMK

Writing – original draft: VM, VMK

Writing – review & editing: VM, BK, DS, PP, VMK

**Competing interests:** Authors declare that they have no competing interests.

**Data and materials availability:** The atomic coordinates, structure factors and density maps will be deposited in the Protein Data Bank and Electron Microscopy Data Bank. The mass spectrometry data will be deposited at ProteomeXChange via PRIDE. All other data are available in the main text or the supplementary materials.

**Supplementary Materials**

Materials and Methods

Figs. S1 to S9

Tables S1 to S2

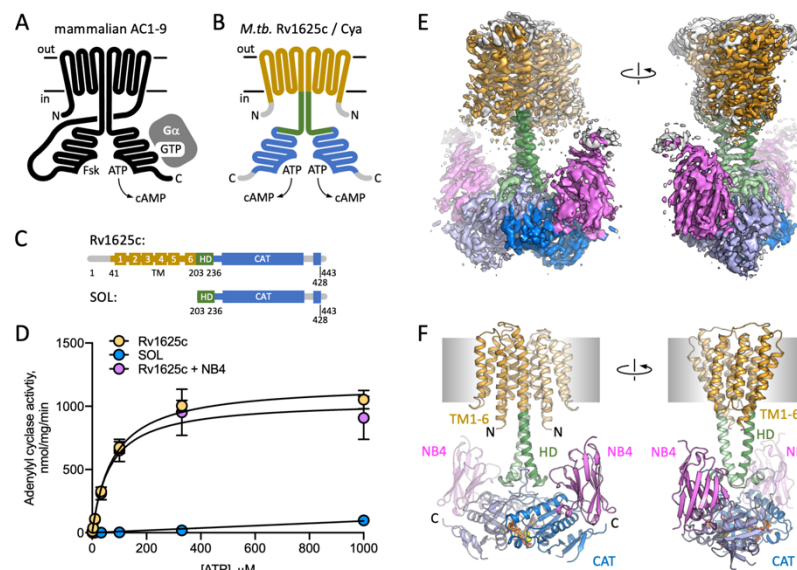

**Fig. 1. Structure of Cya-NB4 complex.** (A) Schematic representation of the mammalian membrane ACs, indicating the key elements of AC structure: 12 TM domains, two catalytic domains, an ATP and a forskolin (Fsk) binding site. The protein is depicted in a G protein-bound state. (B-C) A schematic representation of Rv1625c / Cya, illustrating the regions resolved in the cryo-EM structure. The TM region is coloured orange, the helical domain (HD) is green, the catalytic domain is blue. Regions absent in the cryo-EM structure are grey. (D) The activity of the full-length Cya in detergent is similar in the absence (yellow) and in the presence of nanobody NB4 (pink); the soluble domain of Cya (SOL, blue) shows low levels of activity. For all experiments the data are shown as mean  $\pm$  S.E.M. (n = 3). (E) The density map of Cya-NB4 complex at 3.57 Å resolution, obtained using masked refinement of the best dataset with c2 symmetry imposed. (F) The corresponding views of the atomic model of Cya-NB4 complex, coloured as in B-C. “N” indicates the N-terminal part of the protein; “HD” – helical domain; “CAT” – catalytic domain.

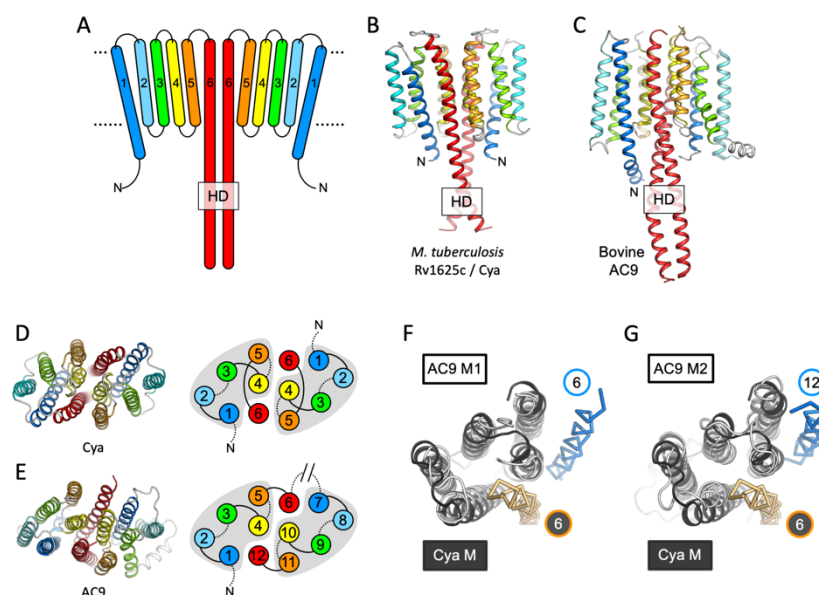

**Fig. 2. Features of the Cya TM domain.** (A) A schematic representation of the 6-TM bundles (TM1-TM6) of Cya, arranged as dimer. (B-C) A view of Cya (B) and AC9 (C) TM domain parallel to the membrane plane. (D-E) A view of Cya (D) and AC9 (E) TM domain perpendicular to the membrane plane. The schematic indicates the relative arrangement of the TM helices, with helices 4, 5 and 6 at the dimer interface. The grey shapes indicate the conserved structural motif (TM1-5 in Cya, TM1-5 and TM7-11 in AC9) of the membrane ACs. The extracellular and intracellular loops connecting the TM helices are shown using solid and dotted lines, respectively. The connection between TM6 and TM7 of AC9 is indicated as a broken line, in place of the catalytic domain C1a and the connecting loop C1b. (F-G) Alignment of the 6-TM bundles of Cya (black) and AC9 (white) reveals a high level of structural conservation, in particular in the TM1-5 (RMSD 3.42 Å over 112 residues; F) and TM7-11 regions of the two proteins (RMSD 3.56 over 112 residues; G). The positions of the HD-forming TM helices are conserved, but the TM6 and TM12 are swapped in AC9 (blue) relative to Cya (orange).



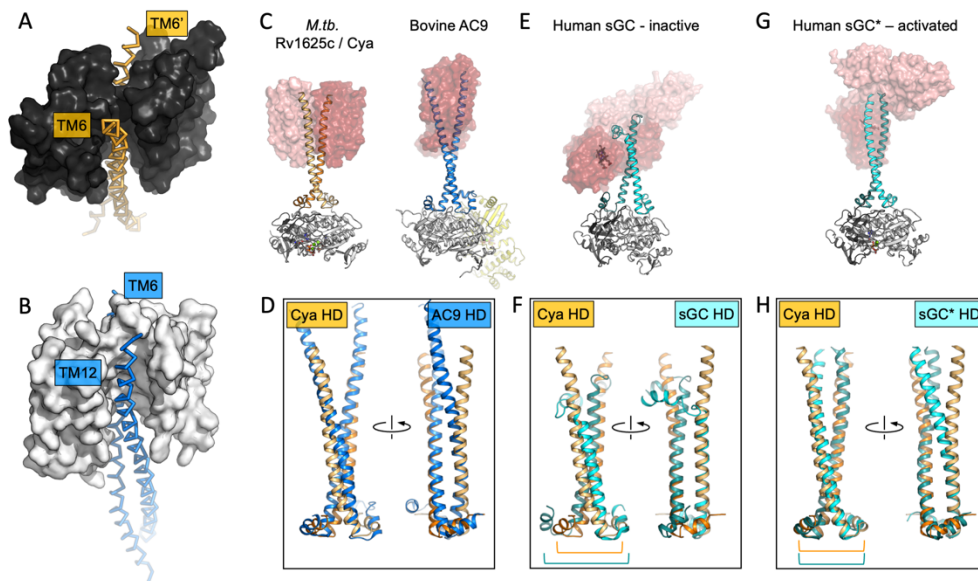

**Fig. 3. The role of the TM domain as a chaperone for HD / AC assembly.** (A-B) Guide rail-like structures are formed by the TM1-5 in Cya (black, A) and the TM1-5/TM7-11 in AC9 (white, B). The arrangement of these rail-like structures positions the TM6 helices for optimal assembly of the helical (HD) and the catalytic domain. (C) The views of Cya and AC9 with the TM1-5 (Cya) and TM1-5/TM7-11 (AC9; PDB ID: 6r3q) represented as transparent surface. (D) The TM-HD regions of Cya and AC9 aligned. Despite the difference in HD length and the deviation in the TM domains, the cores of the HD domains are well aligned. (E-F) Similar to C-D, for the human soluble guanylyl cyclase sGC (inactive form; PDB ID: 6jt0). (G-H) Similar to E-F, for the activated form of sGC (sGC\*; PDB ID: 6jt2). The brackets in F and H indicate the misaligned (F) and aligned (H) portions of the Cya and sGC HDs.

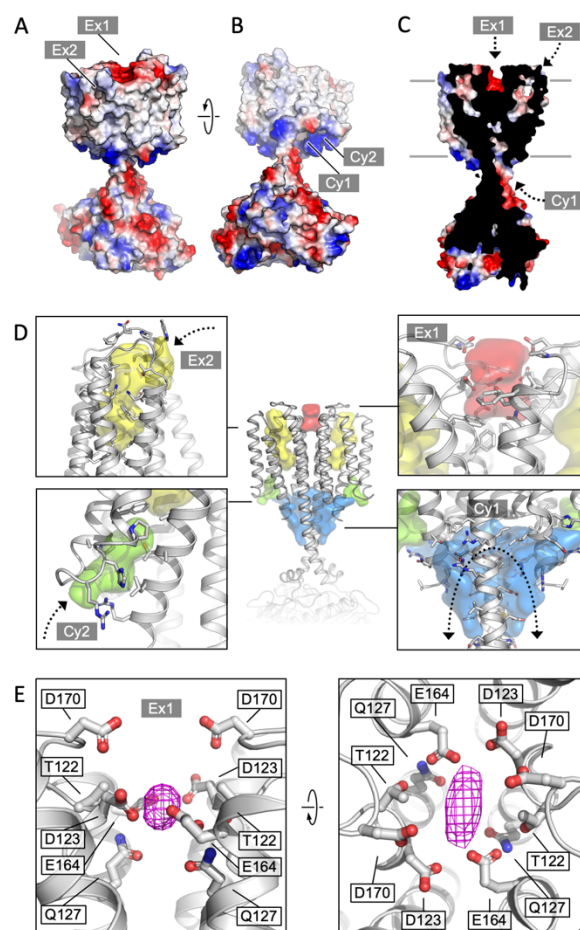

**Fig. 4. Cya TM domain as a receptor module.** (A) A view of the Cya structure (nanobody NB4 not shown) in surface representation, coloured according to electrostatic potential. The location of two putative binding sites, sites Ex1 (negatively charge) and Ex2 (hydrophobic) are indicated. (B) Similar as (A), a view at the Cya structure from the cytosol, showing the locations of the positively charged sites Cy1 and Cy2. (C) A slice through the structure shows the internal cavities with access points Ex1, Ex2 and Cy1. (D) The density maps corresponding to the internal cavities within the TM region of Cya, calculated using 3V (56) and low pass-filtered to 3 Å for presentation purposes. Arrows indicate the access to the cavities. (E) A prominent density featured in the density map of Cya-NB4 complex, occupying the site Ex1. Polar and negatively charged residues surround the density, consistent with a binding site for metals (or organic cations).

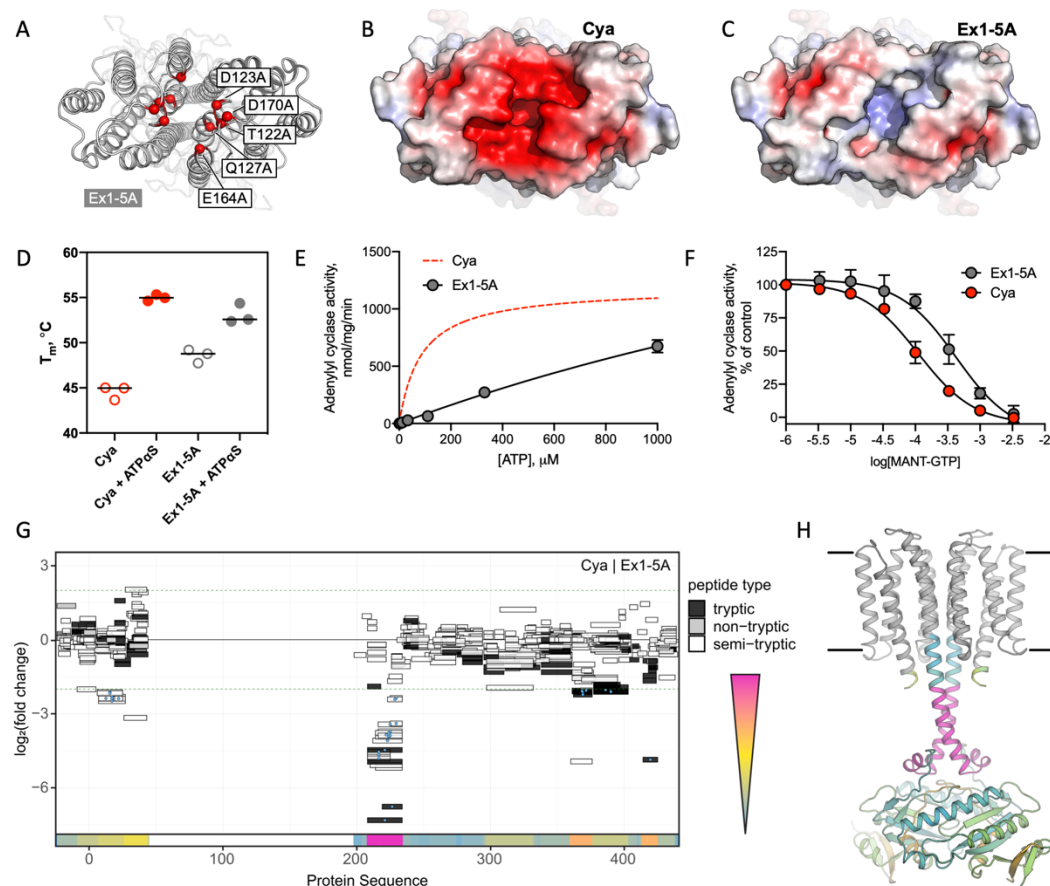

**Fig. 5. Extracellular site Ex1 is linked to the adenyl cyclase activity of Cya.** (A) An illustration of the Ex1 site residues mutated to generate the Ex1-5A mutant, substituting the five indicated residues with Ala. (B) Calculated electrostatic potential of the wild-type Cya. (C) Same as B, for the Ex1-5A mutant. (D) The mutant shows thermostability profile consistent with that of the wild-type protein, based on the observed  $T_m$  values in the presence and in the absence of a nucleotide analogue. (E) The enzymatic properties of the mutant are substantially affected by the mutation (the dashed red curve corresponds to the fit shown for Cya in Fig. 1D for comparison). (F) The affinity of the Ex1-5A mutant for MANT-GTP is reduced (110 and 420  $\mu\text{M}$ , respectively). (G) Limited proteolysis-coupled mass spectrometry (LiP-MS) analysis of Cya and Ex1-5A mutant. The graph indicates sequence coverage and the identified tryptic, semi-trypic or non-trypic peptides. Significantly changing peptides ( $|\log_2(\text{FC})| > 2$ ;  $q\text{-value} < 0.001$ ) are marked with a blue dot. A bar within the plot is coloured according to the change in protease accessibility at each peptide (blue = no change, pink = high fold change; absolute  $\log_2$  transformed fold changes range from 0 to 7.3). (H) A model of Cya coloured according to the bar in (E).

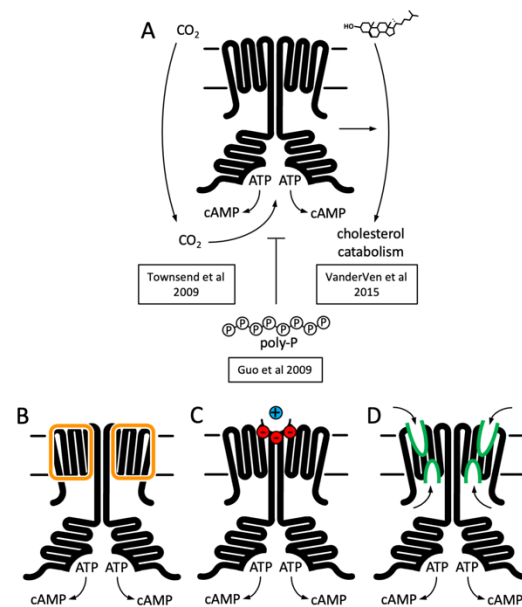

**Fig. 6. Function and structure of Rv1625c / Cya.** (A) Known regulators and cellular functions of Cya. (B-D) Insights into the function of the membrane domain of Cya, with new functions of the TM domain suggested by the cryo-EM structure: a stabilizer of the cytosolic domain assembly (B), a receptor for positively charged agents via the Ex1 site at the Cya dimer interface (C), a receptor of yet unknown ligands via sites Ex2 / Cy1 / Cy2 (D).
